# Supplementary material for: Radical cyclizations of enynes/dienes with alcohols in water using a green oxidant
Source: Royal Society of Chemistry journal article supplement (doi:10.1039/d0ob01902j), 2020-01-01

# Radical cyclization of enynes/dienes with alcohols in-water using green oxidant

Dong-Kai Wang,<sup>a</sup> Yi-Lin Fang,<sup>b, c</sup> Jian Zhang,<sup>a</sup> Yu-Tao Guan,<sup>a</sup> Xun-Jie  
Huang,<sup>a</sup> Jianfeng Zhang,<sup>\*a</sup> Qiang Li<sup>\*b</sup> and Wen-Ting Wei<sup>\*a</sup>

<sup>a</sup> State Key Laboratory Base of Novel Functional Materials and Preparation  
Science, School of Materials Science and Chemical Engineering, Ningbo  
University, Ningbo, Zhejiang, 315211, China.

<sup>b</sup> Institution of Functional Organic Molecules and Materials, School of  
Chemistry and Chemical Engineering, Liaocheng University, Liaocheng, 252059,  
China.

<sup>c</sup> Department of Chemistry, Guilin Normal College, Guilin, 541199, China.

E-mail: zhangjianfeng1@nbu.edu.cn; tiamochem@hotmail.com;  
weiwenting@nbu.edu.cn

## Supporting Information

### List of Contents

|                                                                                                          |               |
|----------------------------------------------------------------------------------------------------------|---------------|
| <b>(A) Synthesis of enynes/dienes and typical experimental procedure for the<br/>radical cyclization</b> | <b>S2</b>     |
| <b>(B) Analytical data</b>                                                                               | <b>S2-12</b>  |
| <b>(C) References</b>                                                                                    | <b>S12-13</b> |
| <b>(D) Spectra</b>                                                                                       | <b>S14-40</b> |

## (A) Synthesis of enynes/dienes and typical experimental procedure for the radical cyclization

Enynes and dienes were prepared according to the known procedures.<sup>[1-2]</sup>

To a Schlenk tube were added enynes **1** (0.2 mmol) or dienes **4** (0.2 mmol), alcohols **2** (0.5 mL), K<sub>2</sub>S<sub>2</sub>O<sub>8</sub> (1.2 equiv), and H<sub>2</sub>O (1.0 mL). Then the tube was stirred at 80 °C or 90 °C sealed in air for the indicated time until complete consumption of starting material as monitored by TLC and/or GC-MS analysis. After the reaction was finished, the mixture was extracted three times with EtOAc. The organic layer was dried over Na<sub>2</sub>SO<sub>4</sub>, filtration and evaporation of the solvent. The mixture was purified by flash column chromatography over silica gel (hexane/ethyl acetate = 5:1) to afford the desired products **3**, **5**, **6**, and **7**.

## (B) Analytical data

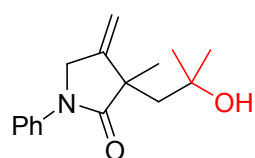

**3-(2-Hydroxy-2-methylpropyl)-3-methyl-4-methylene-1-phenylpyrrolidin-2-one (3aa)**<sup>[1]</sup>, white solid (0.0471 g, 91% yield); <sup>1</sup>H NMR (400 MHz, DMSO-*d*<sub>6</sub>)  $\delta$ : 7.73 (d, *J* = 8.0 Hz, 2H), 7.38 (t, *J* = 8.0 Hz, 2H), 7.13 (t, *J* = 7.6 Hz, 1H), 5.21-5.16 (m, 2H), 4.54-4.46 (m, 2H), 4.08 (s, 1H), 2.04 (d, *J* = 14.0 Hz, 1H), 1.80 (d, *J* = 14.0 Hz, 1H), 1.21 (s, 3H), 1.07 (s, 3H), 1.04 (s, 3H); <sup>13</sup>C NMR (100 MHz, DMSO-*d*<sub>6</sub>)  $\delta$ : 177.5, 146.9, 139.9, 129.2, 124.4, 120.1, 108.5, 69.6, 52.6, 52.2, 48.0, 31.9, 31.6, 28.8.

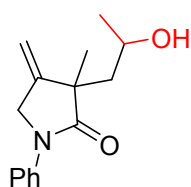

**3-(2-Hydroxypropyl)-3-methyl-4-methylene-1-phenylpyrrolidin-2-one (3ab)**<sup>[1]</sup>, white solid (0.0407 g, 83% yield, d.r. = 1:1); <sup>1</sup>H NMR

(500 MHz, CDCl<sub>3</sub>)  $\delta$ : 7.67-7.64 (m, 2H), 7.41-7.35 (m, 2H), 7.21-7.14 (m, 1H), 5.24 (d,  $J$  = 35.5 Hz, 1H), 5.11 (d,  $J$  = 24.5 Hz, 1H), 4.54-4.48 (m, 2H), 4.21-3.95 (m, 1H), 1.85-1.71 (m, 2H), 1.62 (s, 1H), 1.42 (s, 1.5H), 1.35 (s, 1.5H), 1.20-1.17 (m, 3H); <sup>13</sup>C NMR (125 MHz, CDCl<sub>3</sub>)  $\delta$ : 178.3, 178.1, 147.3, 145.9, 139.1, 138.5, 129.0, 128.9, 125.2, 124.7, 120.4, 120.3, 107.9, 107.7, 65.6, 64.3, 52.2 (2), 48.7, 48.5, 48.1, 48.0, 26.8, 24.7, 24.3, 23.8.

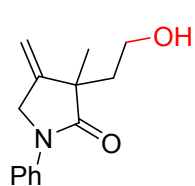

**3-(2-Hydroxyethyl)-3-methyl-4-methylene-1-phenylpyrrolidin-2-**

**one (3ac)**<sup>[1]</sup>, yellow solid (0.0328 g, 71% yield); <sup>1</sup>H NMR (500 MHz,

CDCl<sub>3</sub>)  $\delta$ : 7.66 (d,  $J$  = 8.0 Hz, 2H), 7.39 (t,  $J$  = 8.0 Hz, 2H), 7.18 (t,

$J$  = 7.5 Hz, 1H), 5.24 (t,  $J$  = 2.0 Hz, 1H), 5.13 (t,  $J$  = 2.5 Hz, 1H), 4.52-4.47 (m, 2H),

3.84-3.81 (m, 1H), 3.70-3.66 (m, 1H), 2.56 (s, 1H), 2.07-2.02 (m, 1H), 1.94-1.90 (m,

1H), 1.39 (s, 3H); <sup>13</sup>C NMR (125 MHz, CDCl<sub>3</sub>)  $\delta$ : 177.9, 146.1, 138.7, 128.9, 125.0,

120.2, 108.0, 59.3, 52.1, 48.4, 41.3, 24.6.

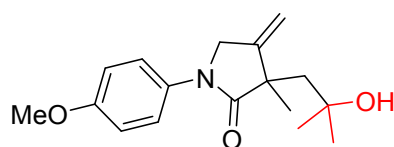

**3-(2-Hydroxy-2-methylpropyl)-1-(4-**

**methoxyphenyl)-3-methyl-4-methylenepyrrolidin-**

**2-one (3ba)**<sup>[1]</sup>, white solid (0.0544 g, 94% yield); <sup>1</sup>H

NMR (500 MHz, CDCl<sub>3</sub>)  $\delta$ : 7.54 (d,  $J$  = 9.5 Hz, 2H), 6.91 (d,  $J$  = 9.0 Hz, 2H), 5.21 (s,

1H), 5.16 (s, 1H), 4.54-4.45 (m, 2H), 3.80 (s, 3H), 2.75 (s, 1H), 2.22 (d,  $J$  = 15.0 Hz,

1H), 1.94 (d,  $J$  = 15.0 Hz, 1H), 1.36 (s, 3H), 1.23 (s, 3H), 1.18 (s, 3H); <sup>13</sup>C NMR (125

MHz, CDCl<sub>3</sub>)  $\delta$ : 177.8, 156.9, 147.2, 131.9, 122.2, 114.1, 107.9, 70.8, 55.4, 52.6, 51.3,

48.1, 31.6, 30.8, 28.6.

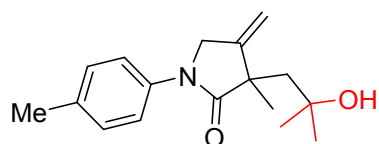

**3-(2-Hydroxy-2-methylpropyl)-3-methyl-4-**

**methylene-1-(*p*-tolyl)pyrrolidin-2-one (3ca)<sup>[1]</sup>, white**

solid (0.0503 g, 92% yield); <sup>1</sup>H NMR (500 MHz,

CDCl<sub>3</sub>)  $\delta$ : 7.52 (d, *J* = 8.5 Hz, 2H), 7.18 (d, *J* = 8.5 Hz, 2H), 5.23 (t, *J* = 2.0 Hz, 1H),

5.16 (t, *J* = 2.0 Hz, 1H), 4.57-4.53 (m, 1H), 4.50-4.46 (m, 1H), 2.33 (s, 3H), 2.31 (s,

1H), 2.22 (d, *J* = 15.0 Hz, 1H), 1.94 (d, *J* = 14.5 Hz, 1H), 1.37 (s, 3H), 1.23 (s, 3H),

1.18 (s, 3H); <sup>13</sup>C NMR (125 MHz, CDCl<sub>3</sub>)  $\delta$ : 178.0, 147.2, 136.2, 134.8, 129.5, 120.5,

107.9, 70.8, 52.3, 51.3, 48.3, 31.6, 30.9, 28.7, 20.9.

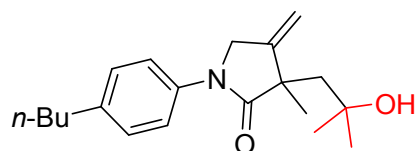

**1-(4-Butylphenyl)-3-(2-hydroxy-2-**

**methylpropyl)-3-methyl-4-methylenepyrrolidin-**

**2-one (3da), yellow oil (0.0574 g, 91% yield); <sup>1</sup>H NMR (500 MHz, CDCl<sub>3</sub>)  $\delta$ : 7.55**

(d, *J* = 8.5 Hz, 2H), 7.19 (d, *J* = 8.0 Hz, 2H), 5.22 (s, 1H), 5.16 (s, 1H), 4.55 (d, *J* =

14.0 Hz, 1H), 4.48 (d, *J* = 14.0 Hz, 1H), 2.59 (t, *J* = 8.0 Hz, 2H), 2.23 (d, *J* = 15.0 Hz,

1H), 1.95 (d, *J* = 15.0 Hz, 1H), 1.61-1.56 (m, 2H), 1.37 (s, 3H), 1.35-1.31 (m, 2H),

1.23 (s, 3H), 1.18 (s, 3H), 0.92 (t, *J* = 7.5 Hz, 3H); <sup>13</sup>C NMR (125 MHz, CDCl<sub>3</sub>)  $\delta$ :

178.0, 147.3, 139.8, 136.5, 128.9, 120.4, 107.9, 70.9, 52.3, 51.3, 48.4, 35.1, 33.6, 31.6,

30.9, 28.7, 22.3, 13.9; HRMS *m/z* (ESI) calcd for C<sub>20</sub>H<sub>30</sub>NO<sub>2</sub> ([M+H]<sup>+</sup>) 316.2271,

found 316.2273.

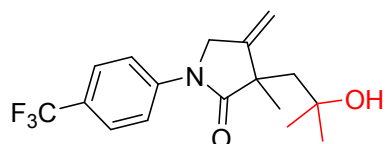

**3-(2-Hydroxy-2-methylpropyl)-3-methyl-4-**

**methylene-1-(4-**

**(trifluoromethyl)phenyl)pyrrolidin-2-one (3ea)<sup>[1]</sup>, white solid (0.0523 g, 80%**

yield); <sup>1</sup>H NMR (500 MHz, CDCl<sub>3</sub>)  $\delta$ : 7.84 (d, *J* = 8.5 Hz, 2H), 7.63 (d, *J* = 8.5 Hz,

2H), 5.29 (t,  $J = 2.0$  Hz, 1H), 5.21 (t,  $J = 2.0$  Hz, 1H), 4.64-4.60 (m, 1H), 4.52-4.49 (m, 1H), 2.26 (d,  $J = 15.0$  Hz, 1H), 2.12 (s, 1H), 1.94 (d,  $J = 14.5$  Hz, 1H), 1.37 (s, 3H), 1.21 (s, 3H), 1.19 (s, 3H);  $^{13}\text{C}$  NMR (125 MHz,  $\text{CDCl}_3$ )  $\delta$ : 178.8, 146.2, 141.8, 126.3 ( $q$ ,  $J_{\text{C-F}} = 32.6$  Hz), 126.1 ( $q$ ,  $J_{\text{C-F}} = 3.6$  Hz), 122.9, 119.5, 108.6, 70.9, 51.9, 51.6, 48.4, 31.8, 31.0, 28.7;  $^{19}\text{F}$  NMR (471 MHz,  $\text{CDCl}_3$ )  $\delta$ : -62.2.

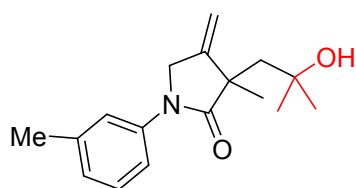

**3-(2-Hydroxy-2-methylpropyl)-3-methyl-4-**

**methylene-1-(*m*-tolyl)pyrrolidin-2-one (3fa),** yellow

oil (0.0486 g, 89% yield);  $^1\text{H}$  NMR (500 MHz,  $\text{CDCl}_3$ )

$\delta$ : 7.52 (s, 1H), 7.42 (d,  $J = 8.0$  Hz, 1H), 7.26 (t,  $J = 8.0$  Hz, 1H), 6.99 (d,  $J = 7.5$  Hz, 1H), 5.23 (s, 1H), 5.16 (s, 1H), 4.57 (d,  $J = 14.0$  Hz, 1H), 4.48 (d,  $J = 14.0$  Hz, 1H), 2.70 (s, 1H), 2.37 (s, 3H), 2.23 (d,  $J = 15.0$  Hz, 1H), 1.94 (d,  $J = 15.0$  Hz, 1H), 1.37 (s, 3H), 1.23 (s, 3H), 1.19 (s, 3H);  $^{13}\text{C}$  NMR (125 MHz,  $\text{CDCl}_3$ )  $\delta$ : 178.2, 147.1, 138.9, 138.8, 128.8, 125.9, 121.2, 117.5, 108.0, 70.9, 52.3, 51.3, 48.4, 31.7, 30.9, 28.7, 21.6; HRMS  $m/z$  (ESI) calcd for  $\text{C}_{17}\text{H}_{24}\text{NO}_2$  ( $[\text{M}+\text{H}]^+$ ) 274.1802, found 274.1800.

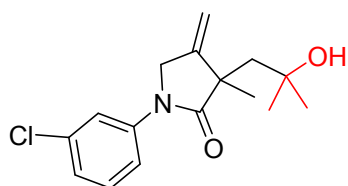

**1-(3-Chlorophenyl)-3-(2-hydroxy-2-methylpropyl)-3-**

**methyl-4-methylenepyrrolidin-2-one (3ga),** yellow oil

(0.0498 g, 85% yield);  $^1\text{H}$  NMR (500 MHz,  $\text{CDCl}_3$ )  $\delta$ :

7.77 (s, 1H), 7.57 (d,  $J = 8.0$  Hz, 1H), 7.29 (t,  $J = 8.0$  Hz, 1H), 7.13 (d,  $J = 8.0$  Hz, 1H), 5.26 (s, 1H), 5.18 (s, 1H), 4.56 (d,  $J = 13.5$  Hz, 1H), 4.45 (d,  $J = 14.0$  Hz, 1H), 2.37 (s, 1H), 2.24 (d,  $J = 15.0$  Hz, 1H), 1.92 (d,  $J = 15.0$  Hz, 1H), 1.35 (s, 3H), 1.35 (s, 3H), 1.18 (s, 3H);  $^{13}\text{C}$  NMR (125 MHz,  $\text{CDCl}_3$ )  $\delta$ : 178.5, 146.4, 140.1, 134.7,

129.9, 124.8, 120.2, 118.0, 108.5, 70.9, 52.1, 51.6, 48.4, 31.8, 30.9, 28.7; HRMS  $m/z$  (ESI) calcd for  $C_{16}H_{21}ClNO_2$  ( $[M+H]^+$ ) 294.1255, found 294.1257.

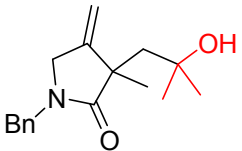**1-Benzyl-3-(2-hydroxy-2-methylpropyl)-3-methyl-4-methylenepyrrolidin-2-one (3ha)**<sup>[1]</sup>, white solid (0.0393 g, 72% yield);  $^1H$  NMR (500 MHz,  $CDCl_3$ )  $\delta$ : 7.32 (t,  $J = 7.5$  Hz, 2H), 7.29-7.24 (m, 3H), 5.05-5.02 (m, 2H), 4.56 (d,  $J = 14.5$  Hz, 1H), 4.47 (d,  $J = 15.0$  Hz, 1H), 3.94-3.86 (m, 2H), 3.24 (s, 1H), 2.14 (d,  $J = 15.0$  Hz, 1H), 1.89 (d,  $J = 15.0$  Hz, 1H), 1.29 (s, 3H), 1.22 (s, 3H), 1.09 (s, 3H);  $^{13}C$  NMR (125 MHz,  $CDCl_3$ )  $\delta$ : 178.7, 147.9, 135.7, 128.7, 128.3, 127.7, 107.6, 70.6, 50.7, 50.1, 47.2, 46.5, 31.7, 30.6, 28.7.

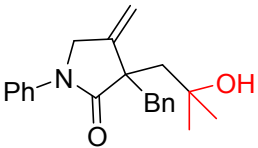**3-Benzyl-3-(2-hydroxy-2-methylpropyl)-4-methylene-1-phenylpyrrolidin-2-one (3ia)**<sup>[1]</sup>, white solid (0.0489 g, 73% yield);  $^1H$  NMR (500 MHz,  $CDCl_3$ )  $\delta$ : 7.34-7.30 (m, 4H), 7.17-7.14 (m, 6H), 5.35-5.28 (m, 2H), 4.16-4.12 (m, 1H), 3.45-3.41 (m, 1H), 3.29 (d,  $J = 12.5$  Hz, 1H), 3.02 (s, 1H), 2.67 (d,  $J = 12.5$  Hz, 1H), 2.46 (d,  $J = 15.0$  Hz, 1H), 2.14 (d,  $J = 15.0$  Hz, 1H), 1.27 (s, 3H), 1.21 (s, 3H);  $^{13}C$  NMR (125 MHz,  $CDCl_3$ )  $\delta$ : 176.6, 144.6, 138.2, 135.6, 130.4, 128.8, 127.8, 126.8, 125.4, 121.1, 109.3, 70.9, 54.8, 52.8, 50.0, 48.7, 32.2, 30.9.

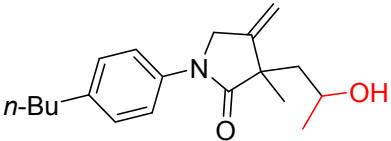**1-(4-Butylphenyl)-3-(2-hydroxypropyl)-3-methyl-4-methylenepyrrolidin-2-one (3db)**, yellow oil (0.0524 g, 87% yield, d.r. = 1:1);  $^1H$  NMR (500 MHz,  $CDCl_3$ )  $\delta$ : 7.48-7.45 (m, 2H), 7.13-7.09 (m, 2H), 5.19-5.11 (m, 1H), 5.05-5.00 (m, 1H), 4.44-4.38 (m, 1H), 4.15-4.06 (m, 1H), 4.03-3.99 (m, 1H), 2.54-2.49 (m, 2H), 1.74-1.66 (m, 2H), 1.52-1.47 (m, 2H), 1.27 (s, 3H), 1.23-1.84 (m, 2H), 1.12 (d,  $J = 6.0$  Hz, 1.5H), 1.09 (d,  $J = 6.5$  Hz,

1.5H), 0.85 (t,  $J = 8.5$  Hz, 3H);  $^{13}\text{C}$  NMR (125 MHz,  $\text{CDCl}_3$ )  $\delta$ : 178.1, 178.0, 147.6, 146.2, 140.1, 139.6, 136.7, 136.1, 128.9, 128.8, 120.5, 120.4, 107.8, 107.6, 73.2, 52.4 (2), 48.6, 48.5, 48.1, 48.0, 35.1, 33.6 (2), 30.6, 30.5, 30.4, 22.3, 13.9; HRMS  $m/z$  (ESI) calcd for  $\text{C}_{19}\text{H}_{28}\text{NO}_2$  ( $[\text{M}+\text{H}]^+$ ) 302.2115, found 302.2117.

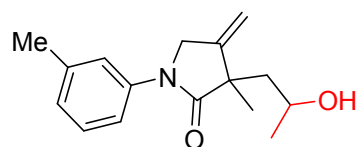

**3-(2-Hydroxypropyl)-3-methyl-4-methylene-1-(*m*-**

**tolyl)pyrrolidin-2-one (3fb)**, yellow oil (0.0301 g, 88%

yield, d.r. = 1:1);  $^1\text{H}$  NMR (500 MHz,  $\text{CDCl}_3$ )  $\delta$ : 7.56-7.51 (m, 1H), 7.42-7.37 (m, 1H), 7.28-7.23 (m, 1H), 7.02-6.97 (m, 1H), 5.26-5.19 (m, 1H), 5.13-5.07 (m, 1H), 4.55-4.46 (m, 2H), 4.16-4.12 (m, 0.5H), 3.91-3.85 (m, 0.5H), 2.37 (s, 1.5H), 2.36 (s, 1.5H), 1.82-1.74 (m, 2H), 1.41 (s, 1.5H), 1.34 (s, 1.5H), 1.19 (d,  $J = 6.5$  Hz, 1.5H), 1.17 (d,  $J = 6.5$  Hz, 1.5H);  $^{13}\text{C}$  NMR (125 MHz,  $\text{CDCl}_3$ )  $\delta$ : 178.3, 178.2, 147.5, 146.1, 139.0, 138.9, 138.8, 138.5, 128.8, 128.7, 126.1, 125.7, 121.3, 121.2, 117.6, 117.5, 107.8, 107.7, 65.6, 64.4, 52.4 (2), 48.7, 48.6, 48.2, 48.0, 26.8, 24.7, 24.3, 23.8, 21.6; HRMS  $m/z$  (ESI) calcd for  $\text{C}_{16}\text{H}_{22}\text{NO}_2$  ( $[\text{M}+\text{H}]^+$ ) 260.1645, found 260.1643.

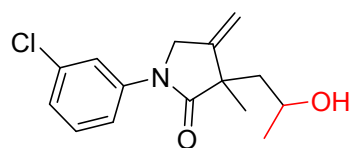

**1-(3-Chlorophenyl)-3-(2-hydroxypropyl)-3-methyl-4-**

**methylenepyrrolidin-2-one (3gb)**, yellow oil (0.0452 g,

81% yield, d.r. = 1:1);  $^1\text{H}$  NMR (500 MHz,  $\text{CDCl}_3$ )  $\delta$ : 7.75 (s, 1H), 7.60-7.54 (m, 1H), 7.32-7.27 (m, 1H), 7.16-7.11 (m, 1H), 5.29-5.21 (m, 1H), 5.14-5.09 (m, 1H), 4.55-4.45 (m, 2H), 4.13-4.07 (m, 0.5H), 3.90-3.84 (m, 0.5H), 1.82-1.70 (m, 2H), 1.41 (s, 1.5H), 1.34 (s, 1.5H), 1.19-1.16 (m, 3H);  $^{13}\text{C}$  NMR (125 MHz,  $\text{CDCl}_3$ )  $\delta$ : 178.5 (2), 146.8, 145.3, 140.3, 139.7, 134.7, 134.6, 130.0, 129.8, 125.1, 124.6, 120.3, 120.2,

118.1, 118.0, 108.2, 108.0, 65.6, 64.6, 52.1 (2), 48.8, 48.5, 48.3, 48.2, 26.8, 24.7, 24.4, 24.0; HRMS  $m/z$  (ESI) calcd for  $C_{15}H_{19}ClNO_2$  ( $[M+H]^+$ ) 280.1099, found 280.1097.

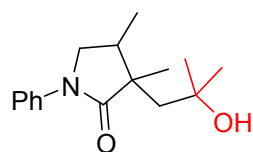

**3-(2-Hydroxy-2-methylpropyl)-3,4-dimethyl-1-**

**phenylpyrrolidin-2-one (5aa)**<sup>[2]</sup>, yellow oil (0.0428 g, 82%

yield, d.r. > 20:1);  $^1H$  NMR (500 MHz,  $CDCl_3$ )  $\delta$ : 7.59 (d,  $J = 8.0$  Hz, 2H), 7.36 (t,  $J = 8.0$  Hz, 2H), 7.14 (t,  $J = 7.5$  Hz, 1H), 3.78 (t,  $J = 8.5$  Hz, 1H), 3.44 (t,  $J = 10.0$  Hz, 1H), 2.75-2.69 (m, 1H), 2.00 (d,  $J = 15.0$  Hz, 1H), 1.73 (d,  $J = 15.0$  Hz, 1H), 1.33 (s, 3H), 1.28 (s, 3H), 1.25 (s, 1H), 1.12 (s, 3H), 1.07 (d,  $J = 6.5$  Hz, 3H);  $^{13}C$  NMR (125 MHz,  $CDCl_3$ )  $\delta$ : 180.2, 139.3, 128.8, 124.7, 120.1, 70.5, 52.5, 48.2, 47.9, 35.1, 32.4, 31.0, 18.6, 11.4.

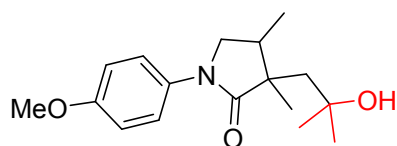

**3-(2-Hydroxy-2-methylpropyl)-1-(4-**

**methoxyphenyl)-3,4-dimethylpyrrolidin-2-one**

**(5ba)**<sup>[2]</sup>, yellow oil (0.0582 g, 88% yield, d.r. > 20:1);  $^1H$  NMR (500 MHz,  $CDCl_3$ )  $\delta$ : 7.47 (d,  $J = 9.0$  Hz, 2H), 6.89 (d,  $J = 9.0$  Hz, 2H), 3.80 (s, 3H), 3.74 (t,  $J = 8.5$  Hz, 1H), 3.42 (t,  $J = 10.0$  Hz, 1H), 2.68-2.63 (m, 1H), 1.97 (d,  $J = 15.0$  Hz, 1H), 1.74 (d,  $J = 15.0$  Hz, 1H), 1.62 (s, 1H), 1.33 (s, 3H), 1.28 (s, 3H), 1.13 (s, 3H), 1.06 (d,  $J = 7.0$  Hz, 3H);  $^{13}C$  NMR (125 MHz,  $CDCl_3$ )  $\delta$ : 179.9, 156.8, 132.6, 122.0, 114.1, 70.4, 55.5, 53.1, 48.2, 48.0, 35.7, 32.4, 31.2, 18.6, 11.5.

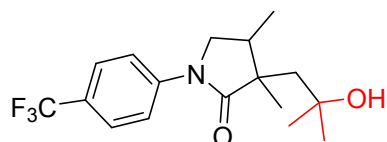

**3-(2-Hydroxy-2-methylpropyl)-3,4-dimethyl-1-(4-**

**(trifluoromethyl)phenyl)pyrrolidin-2-one (5ca)**

yellow oil (0.0513 g, 78% yield, d.r. > 20:1);  $^1H$  NMR (500 MHz,  $CDCl_3$ )  $\delta$ : 7.39 (d,  $J = 8.5$  Hz, 2H), 6.61 (d,  $J = 8.5$  Hz, 2H), 3.17-3.13 (m, 1H), 3.01-2.97 (m, 1H), 2.16-



2.12 (m, 1H), 2.07 (d,  $J = 13.5$  Hz, 1H), 1.83 (d,  $J = 13.5$  Hz, 1H), 1.49 (s, 3H), 1.35 (s, 3H), 1.33 (s, 3H), 1.02 (d,  $J = 7.0$  Hz, 3H);  $^{13}\text{C}$  NMR (125 MHz,  $\text{CDCl}_3$ )  $\delta$ : 181.7, 150.4, 126.6 ( $q$ ,  $J_{\text{C-F}} = 3.8$  Hz), 126.1, 119.4, 111.9, 70.4, 52.0, 48.0, 46.6, 38.8, 30.2, 30.1, 22.7, 13.6;  $^{19}\text{F}$  NMR (471 MHz,  $\text{CDCl}_3$ )  $\delta$ : -61.0; HRMS  $m/z$  (ESI) calcd for  $\text{C}_{17}\text{H}_{23}\text{F}_3\text{NO}_2$  ( $[\text{M}+\text{H}]^+$ ) 330.1675, found 330.1671.

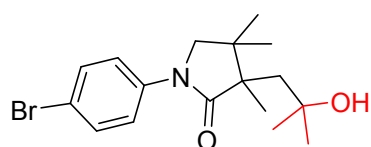

**1-(4-Bromophenyl)-3-(2-hydroxy-2-methylpropyl)-**

**3,4,4-trimethylpyrrolidin-2-one (5da)**, yellow oil

(0.0600 g, 85% yield);  $^1\text{H}$  NMR (500 MHz,  $\text{CDCl}_3$ )  $\delta$ : 7.51 (d,  $J = 9.0$  Hz, 2H), 7.47 (d,  $J = 9.0$  Hz, 2H), 5.23 (s, 1H), 3.56-3.50 (m, 2H), 1.92 (d,  $J = 14.5$  Hz, 1H), 1.45 (d,  $J = 14.5$  Hz, 1H), 1.35 (s, 3H), 1.34 (s, 3H), 1.19 (s, 3H), 1.08 (s, 3H), 1.06 (s, 3H);  $^{13}\text{C}$  NMR (125 MHz,  $\text{CDCl}_3$ )  $\delta$ : 180.5, 138.4, 131.9, 121.5, 117.7, 70.1, 59.1, 51.1, 44.2, 40.3, 33.3, 31.5, 22.5, 21.9, 17.6; HRMS  $m/z$  (ESI) calcd for  $\text{C}_{17}\text{H}_{25}\text{BrNO}_2$  ( $[\text{M}+\text{H}]^+$ ) 354.1063, found 354.1067.

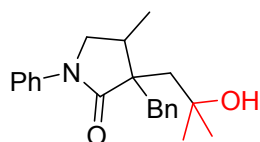

**3-Benzyl-3-(2-hydroxy-2-methylpropyl)-4-methyl-1-**

**phenylpyrrolidin-2-one (5ea)**<sup>[2]</sup>, colorless oil (0.0499 g, 74%

yield, d.r. > 20:1);  $^1\text{H}$  NMR (500 MHz,  $\text{CDCl}_3$ )  $\delta$ : 7.54 (d,  $J = 8.0$  Hz, 2H), 7.35 (t,  $J = 8.0$  Hz, 2H), 7.29-7.27 (m, 4H), 7.22-7.19 (m, 1H), 7.15 (t,  $J = 7.5$  Hz, 1H), 4.03 (s, 1H), 3.83 (d,  $J = 14.0$  Hz, 1H), 3.50-3.45 (m, 2H), 2.80 (d,  $J = 14.0$  Hz, 1H), 2.38-2.32 (m, 1H), 1.82 (d,  $J = 14.5$  Hz, 1H), 1.64 (d,  $J = 14.5$  Hz, 1H), 1.42 (s, 3H), 1.17 (s, 3H), 0.95 (d,  $J = 7.0$  Hz, 3H);  $^{13}\text{C}$  NMR (125 MHz,  $\text{CDCl}_3$ )  $\delta$ : 178.8, 139.0, 137.9, 130.8, 128.8, 128.2, 126.5, 125.0, 120.3, 70.4, 52.3, 51.9, 43.2, 42.1, 34.4, 32.3, 31.8, 10.8.

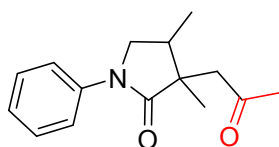

**3,4-Dimethyl-3-(2-oxopropyl)-1-phenylpyrrolidin-2-one**

**(6ab)**<sup>[2]</sup>, yellow oil (0.0368 g, 75% yield, d.r. > 20:1); <sup>1</sup>H

NMR (500 MHz, CDCl<sub>3</sub>) δ: 7.62 (d, *J* = 8.0 Hz, 2H), 7.37 (t, *J* = 8.0 Hz, 2H), 7.14 (t, *J* = 7.0 Hz, 1H), 3.96-3.92 (m, 1H), 3.47-3.44 (m, 1H), 2.85 (d, *J* = 18.0 Hz, 1H), 2.73 (d, *J* = 18.0 Hz, 1H), 2.50-2.47 (m, 1H), 2.15 (s, 3H), 1.30 (s, 3H), 1.02 (d, *J* = 7.0 Hz, 3H); <sup>13</sup>C NMR (125 MHz, CDCl<sub>3</sub>) δ: 207.1, 177.3, 139.7, 128.8, 124.5, 120.1, 53.3, 47.0, 46.7, 35.9, 30.8, 23.4, 15.3.

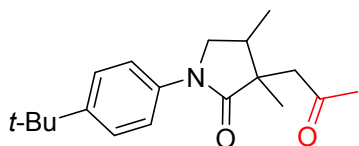

**1-(4-(*tert*-Butyl)phenyl)-3,4-dimethyl-3-(2-**

**oxopropyl)pyrrolidin-2-one (6fb)**, yellow oil (0.0458

g, 76% yield, d.r. > 20:1); <sup>1</sup>H NMR (500 MHz, CDCl<sub>3</sub>) δ: 7.55 (d, *J* = 8.5 Hz, 2H), 7.39 (d, *J* = 8.5 Hz, 2H), 3.95-3.92 (m, 1H), 3.45-3.42 (m, 1H), 2.86 (d, *J* = 18.0 Hz, 1H), 2.72 (d, *J* = 18.0 Hz, 1H), 2.50-2.46 (m, 1H), 2.15 (s, 3H), 1.33 (s, 3H), 1.31 (s, 9H), 1.01 (d, *J* = 7.5 Hz, 3H); <sup>13</sup>C NMR (125 MHz, CDCl<sub>3</sub>) δ: 207.2, 177.2, 147.5, 137.1, 125.7, 119.8, 53.4, 47.0, 46.6, 36.0, 34.4, 31.4, 31.3, 23.3, 15.5; HRMS *m/z* (ESI) calcd for C<sub>19</sub>H<sub>28</sub>NO<sub>2</sub> ([M+H]<sup>+</sup>) 302.2115, found 302.2111.

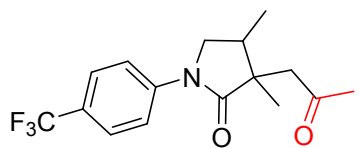

**3,4-Dimethyl-3-(2-oxopropyl)-1-(4-**

**(trifluoromethyl)phenyl)pyrrolidin-2-one (6cb)**,

yellow oil (0.0445 g, 71% yield, d.r. > 20:1); <sup>1</sup>H NMR (500 MHz, CDCl<sub>3</sub>) δ: 7.78 (d, *J* = 8.5 Hz, 2H), 7.62 (d, *J* = 9.0 Hz, 2H), 3.96-3.93 (m, 1H), 3.52-3.49 (m, 1H), 2.85 (d, *J* = 18.0 Hz, 1H), 2.76 (d, *J* = 18.0 Hz, 1H), 2.52-2.48 (m, 1H), 2.15 (s, 3H), 1.30 (s, 3H), 1.03 (d, *J* = 7.0 Hz, 3H); <sup>13</sup>C NMR (125 MHz, CDCl<sub>3</sub>) δ: 206.9, 178.0, 142.6, 126.1 (*q*, *J*<sub>C-F</sub> = 32.5 Hz), 126.0 (*q*, *J*<sub>C-F</sub> = 3.8 Hz), 125.2, 119.4, 53.1, 47.1, 47.0, 35.8,

30.6, 24.1, 15.1;  $^{19}\text{F}$  NMR (471 MHz,  $\text{CDCl}_3$ )  $\delta$ : -62.2; HRMS  $m/z$  (ESI) calcd for  $\text{C}_{16}\text{H}_{19}\text{F}_3\text{NO}_2$  ( $[\text{M}+\text{H}]^+$ ) 314.1362, found 314.1364.

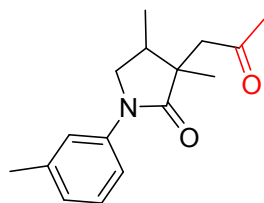

**3,4-Dimethyl-3-(2-oxopropyl)-1-(*m*-tolyl)pyrrolidin-2-one**

**(6gb)**, yellow oil (0.0399 g, 77% yield, d.r. > 20:1);  $^1\text{H}$  NMR

(500 MHz,  $\text{CDCl}_3$ )  $\delta$ : 7.49 (s, 1H), 7.39 (d,  $J = 8.0$  Hz, 1H),

7.25 (t,  $J = 7.0$  Hz, 1H), 6.97 (d,  $J = 7.5$  Hz, 1H), 3.95-3.91 (m, 1H), 3.46-3.43 (m,

1H), 2.85 (d,  $J = 18.0$  Hz, 1H), 2.73 (d,  $J = 18.0$  Hz, 1H), 2.50-2.46 (m, 1H), 2.36 (s,

3H), 2.16 (s, 3H), 1.29 (s, 3H), 1.02 (d,  $J = 7.0$  Hz, 3H);  $^{13}\text{C}$  NMR (125 MHz,  $\text{CDCl}_3$ )

$\delta$ : 207.2, 177.3, 139.6, 138.7, 128.7, 125.4, 120.9, 117.2, 53.5, 47.1, 46.7, 35.9, 30.9,

23.4, 21.6, 15.4; HRMS  $m/z$  (ESI) calcd for  $\text{C}_{16}\text{H}_{22}\text{NO}_2$  ( $[\text{M}+\text{H}]^+$ ) 260.1645, found

260.1647.

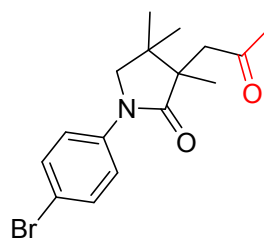

**1-(4-Bromophenyl)-3,4,4-trimethyl-3-(2-**

**oxopropyl)pyrrolidin-2-one (6db)**, yellow oil (0.0485 g, 72%

yield);  $^1\text{H}$  NMR (500 MHz,  $\text{CDCl}_3$ )  $\delta$ : 7.46-7.44 (m, 2H), 7.41-

7.39 (m, 2H), 3.47 (d,  $J = 9.5$  Hz, 1H), 3.30 (d,  $J = 9.5$  Hz, 1H), 2.87 (d,  $J = 17.0$  Hz,

1H), 2.53 (d,  $J = 17.0$  Hz, 1H), 2.13 (s, 3H), 1.17 (s, 3H), 1.16 (s, 3H), 1.01 (s, 3H);

$^{13}\text{C}$  NMR (125 MHz,  $\text{CDCl}_3$ )  $\delta$ : 206.2, 176.6, 137.6, 130.8, 120.2, 116.3, 58.2, 49.5,

45.5, 37.3, 30.7, 23.8, 21.8, 17.1; HRMS  $m/z$  (ESI) calcd for  $\text{C}_{16}\text{H}_{21}\text{BrNO}_2$  ( $[\text{M}+\text{H}]^+$ )

338.0750, found 338.0752.

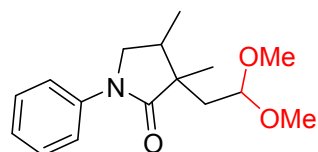

**3-(2,2-Dimethoxyethyl)-3,4-dimethyl-1-**

**phenylpyrrolidin-2-one (7ac)**<sup>[2]</sup>, yellow solid (0.0421 g,

76% yield, d.r. > 20:1);  $^1\text{H}$  NMR (500 MHz,  $\text{CDCl}_3$ )  $\delta$ : 7.64 (d,  $J = 8.0$  Hz, 2H), 7.35

(t,  $J = 8.0$  Hz, 2H), 7.12 (t,  $J = 7.5$  Hz, 1H), 4.63 (t,  $J = 5.0$  Hz, 1H), 3.79-3.76 (m, 1H), 3.43 (t,  $J = 9.0$  Hz, 1H), 3.33 (s, 3H), 3.26 (s, 3H), 2.26-2.22 (m, 1H), 1.85-1.81 (m, 1H), 1.70-1.66 (m, 1H), 1.33 (s, 3H), 1.11 (d,  $J = 7.0$  Hz, 3H);  $^{13}\text{C}$  NMR (125 MHz,  $\text{CDCl}_3$ )  $\delta$ : 177.6, 139.8, 128.8, 124.2, 119.7, 102.4, 53.4, 53.3, 52.2, 45.8, 38.8, 35.7, 22.1, 12.3.

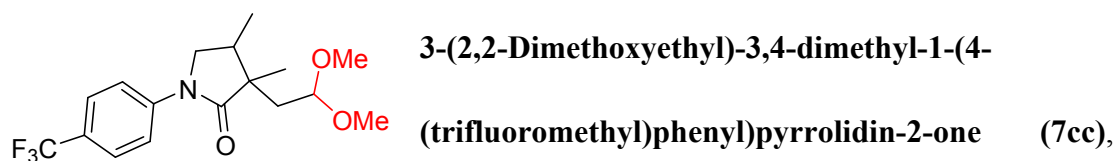

yellow oil (0.0476 g, 69% yield, d.r. > 20:1);  $^1\text{H}$  NMR (500 MHz,  $\text{CDCl}_3$ )  $\delta$ : 7.80 (d,  $J = 8.5$  Hz, 2H), 7.61 (d,  $J = 9.0$  Hz, 2H), 4.59 (t,  $J = 5.0$  Hz, 1H), 4.31 (t,  $J = 7.0$  Hz, 1H), 3.80 (t,  $J = 8.5$  Hz, 1H), 3.44 (t,  $J = 9.5$  Hz, 1H), 3.31 (s, 3H), 3.24 (s, 3H), 1.86-1.82 (m, 1H), 1.75-1.68 (m, 1H), 1.33 (s, 3H), 1.13 (d,  $J = 7.0$  Hz, 3H);  $^{13}\text{C}$  NMR (125 MHz,  $\text{CDCl}_3$ )  $\delta$ : 178.2, 142.6, 130.9, 128.8, 126.0 ( $q$ ,  $J_{\text{C-F}} = 3.8$  Hz), 118.9, 102.1, 53.6, 53.1, 51.9, 45.9, 38.6, 35.8, 22.1, 13.7;  $^{19}\text{F}$  NMR (471 MHz,  $\text{CDCl}_3$ )  $\delta$ : -62.1; HRMS  $m/z$  (ESI) calcd for  $\text{C}_{17}\text{H}_{23}\text{F}_3\text{NO}_3$  ( $[\text{M}+\text{H}]^+$ ) 346.1625, found 346.1629.

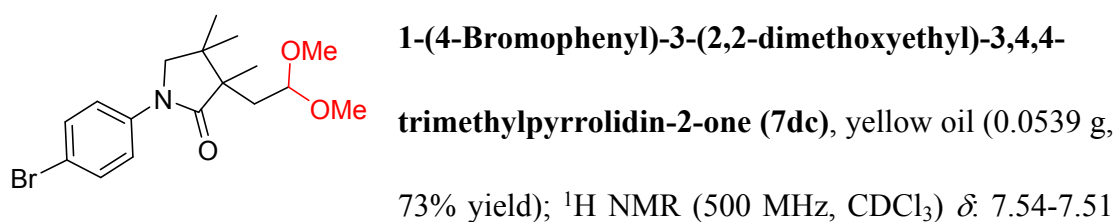

(m, 2H), 7.46-7.43 (m, 2H), 4.67 (t,  $J = 5.0$  Hz, 1H), 3.50 (d,  $J = 9.5$  Hz, 1H), 3.40 (d,  $J = 9.5$  Hz, 1H), 3.33 (s, 3H), 3.25 (s, 3H), 1.97-1.93 (m, 1H), 1.65-1.61 (m, 1H), 1.12 (s, 3H), 1.09 (s, 3H), 1.08 (s, 3H);  $^{13}\text{C}$  NMR (125 MHz,  $\text{CDCl}_3$ )  $\delta$ : 177.9, 139.0, 131.7, 121.0, 116.8, 102.3, 58.5, 53.5, 53.1, 48.9, 38.9, 37.2, 23.6, 21.8, 16.4; HRMS  $m/z$  (ESI) calcd for  $\text{C}_{17}\text{H}_{25}\text{BrNO}_3$  ( $[\text{M}+\text{H}]^+$ ) 370.1012, found 370.1010.

### **(C) References**

- [1] X.-X. Meng, T.-T. Cao, S.-Z. Song, G. Zhou, Q. Li and W.-T. Wei, *Asian J. Org. Chem.*, 2019, **8**, 1827.
- [2] F.-H. Qin, X.-J. Huang, Y. Liu, H. Liang, Q. Li, Z. Cao, W.-T. Wei and W.-M. He, *Chin. Chem. Lett.*, 2020, Doi: 10.1016/j.ccllet.2020.04.042.

## (D) Spectra

### 3-(2-Hydroxy-2-methylpropyl)-3-methyl-4-methylene-1-phenylpyrrolidin-2-one (3aa)

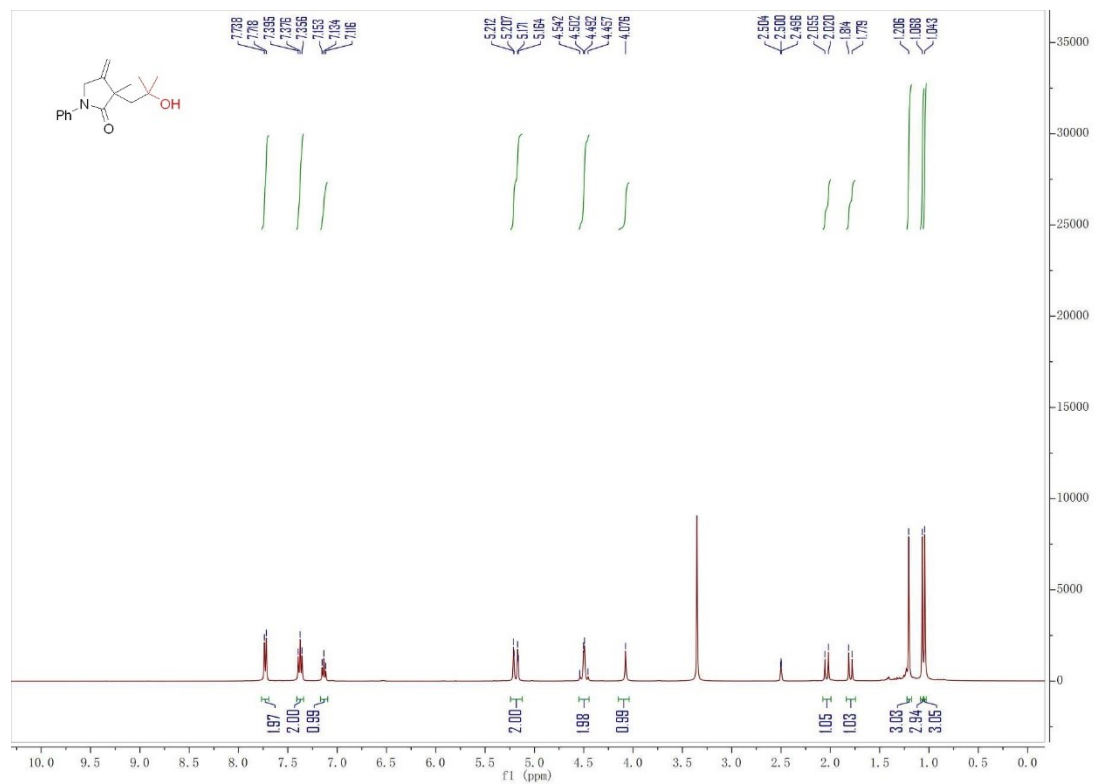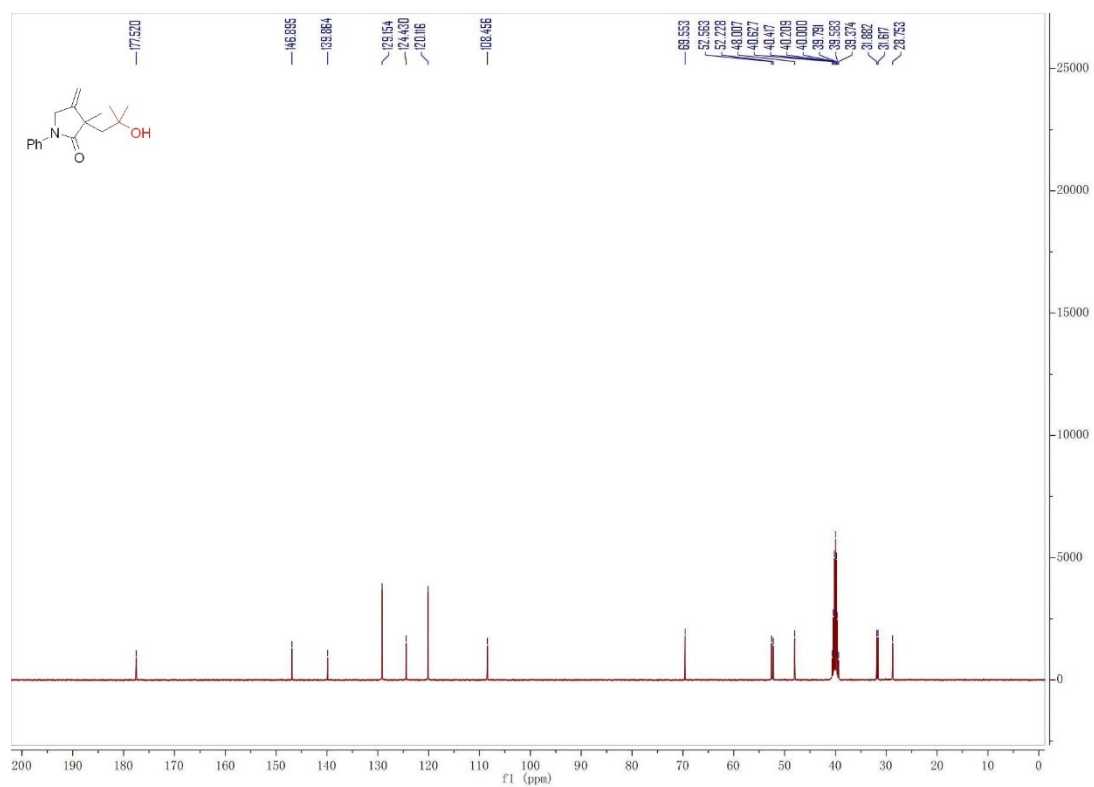

### 3-(2-Hydroxypropyl)-3-methyl-4-methylene-1-phenylpyrrolidin-2-one (3ab)

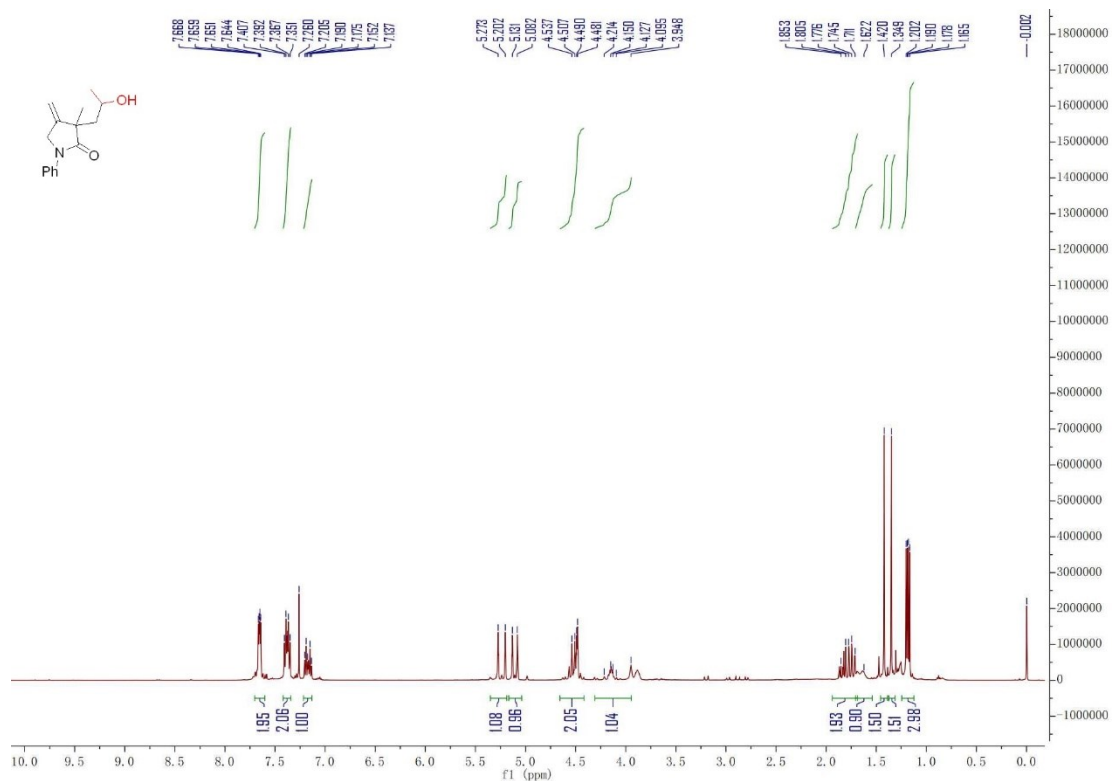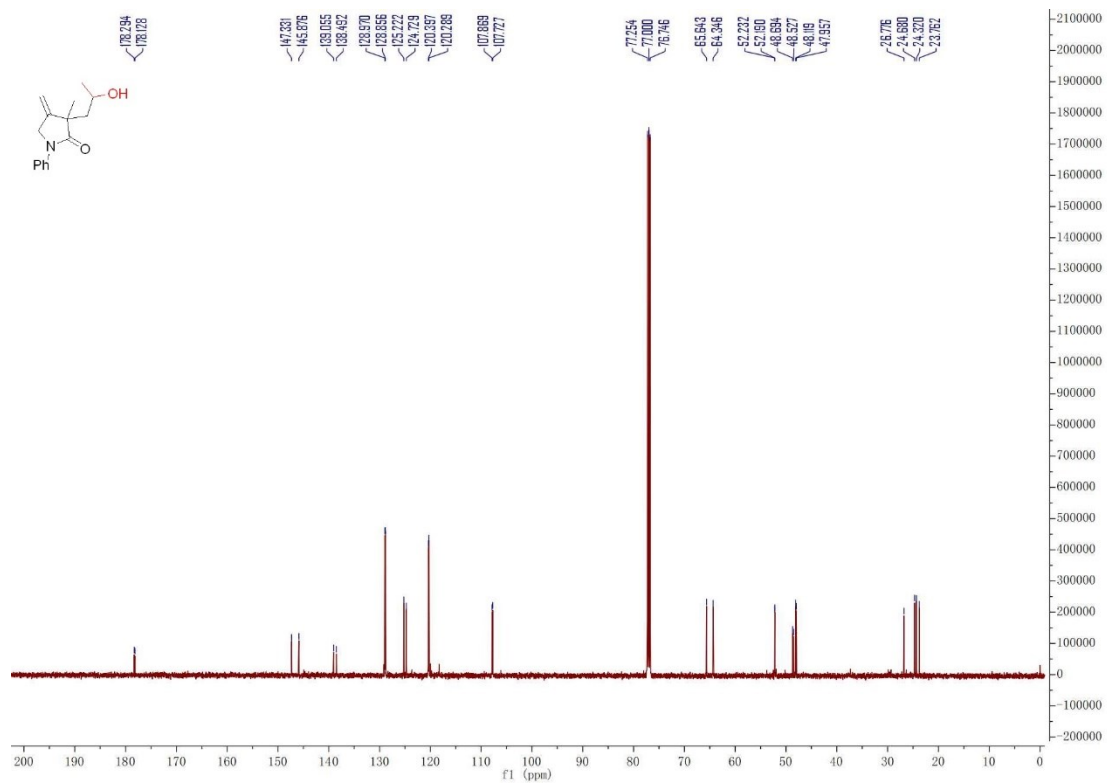

### 3-(2-Hydroxyethyl)-3-methyl-4-methylene-1-phenylpyrrolidin-2-one (3ac)

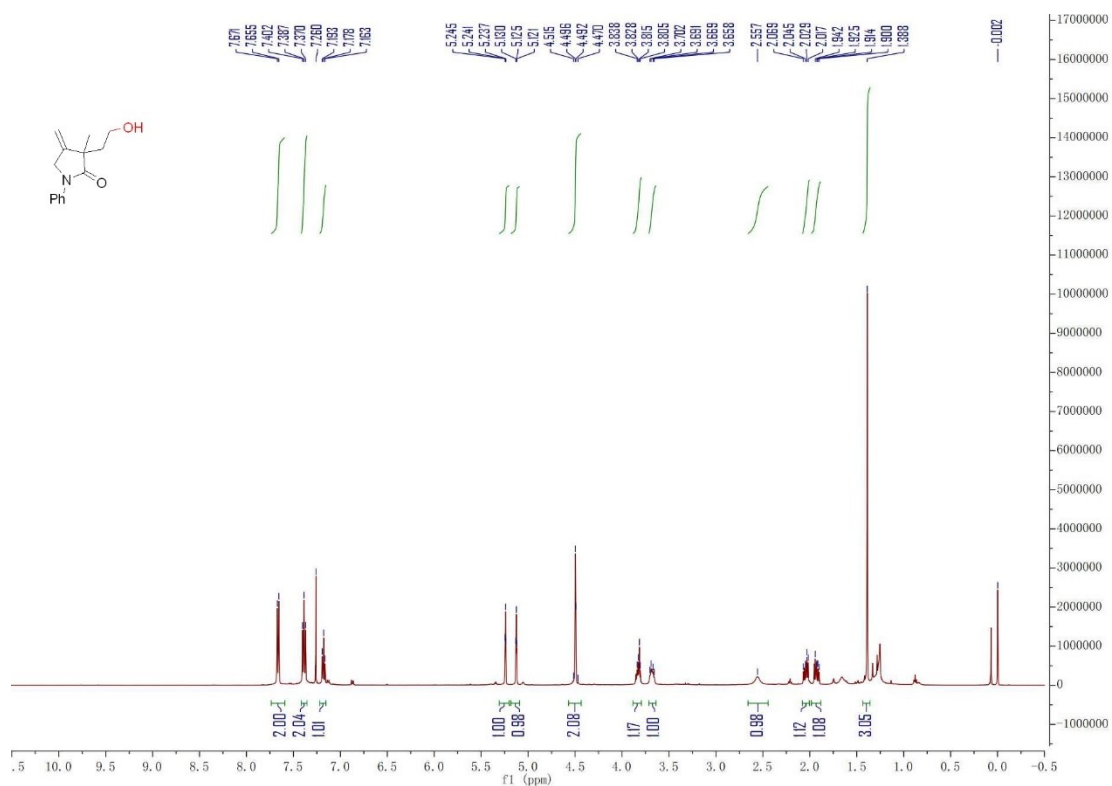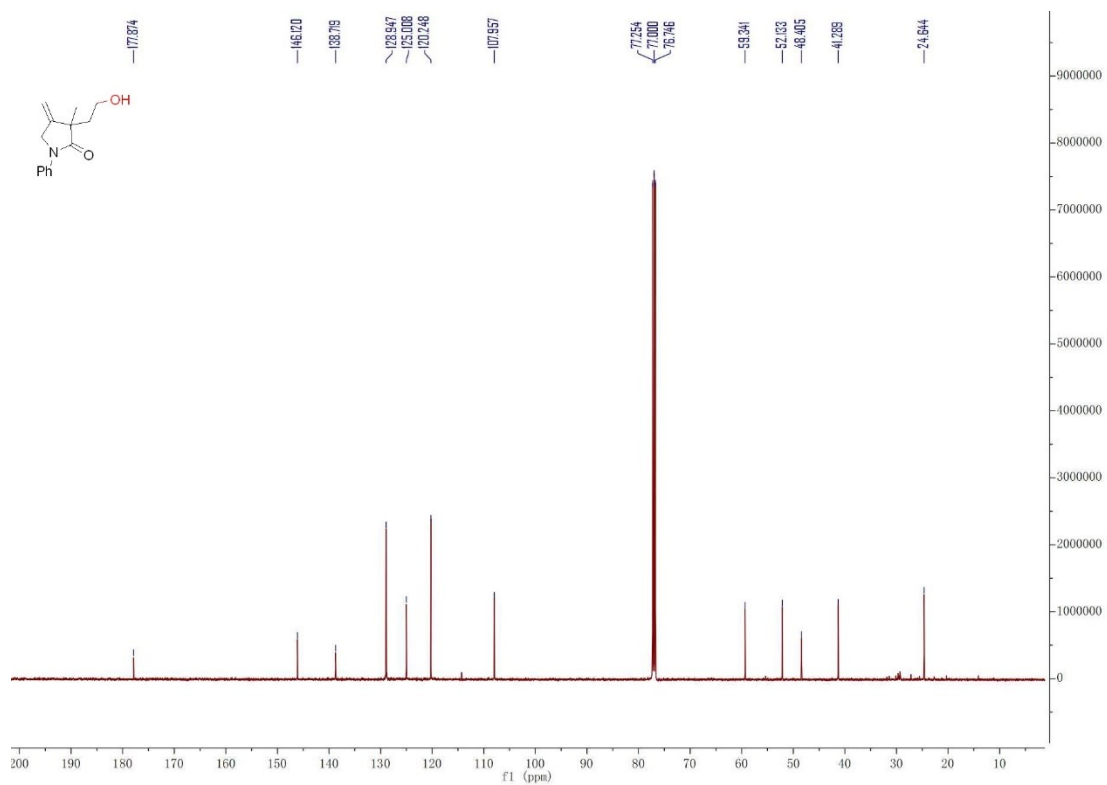



**3-(2-Hydroxy-2-methylpropyl)-1-(4-methoxyphenyl)-3-methyl-4-methylenepyrrolidin-2-one (3ba)**

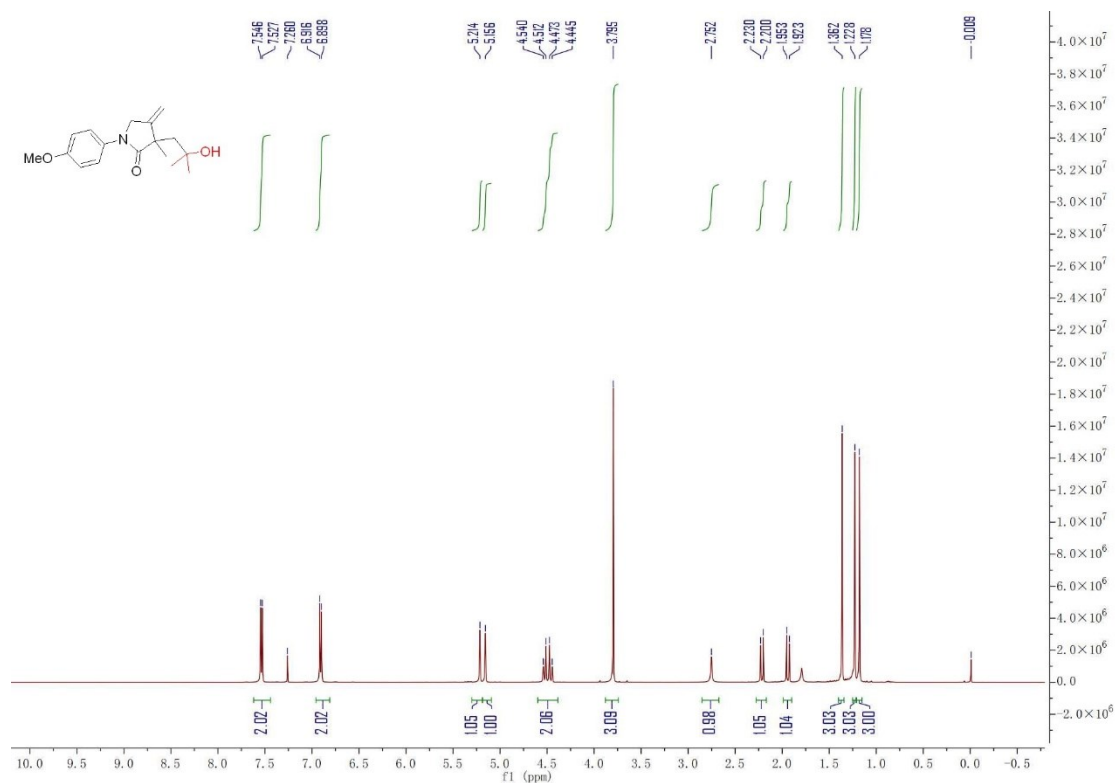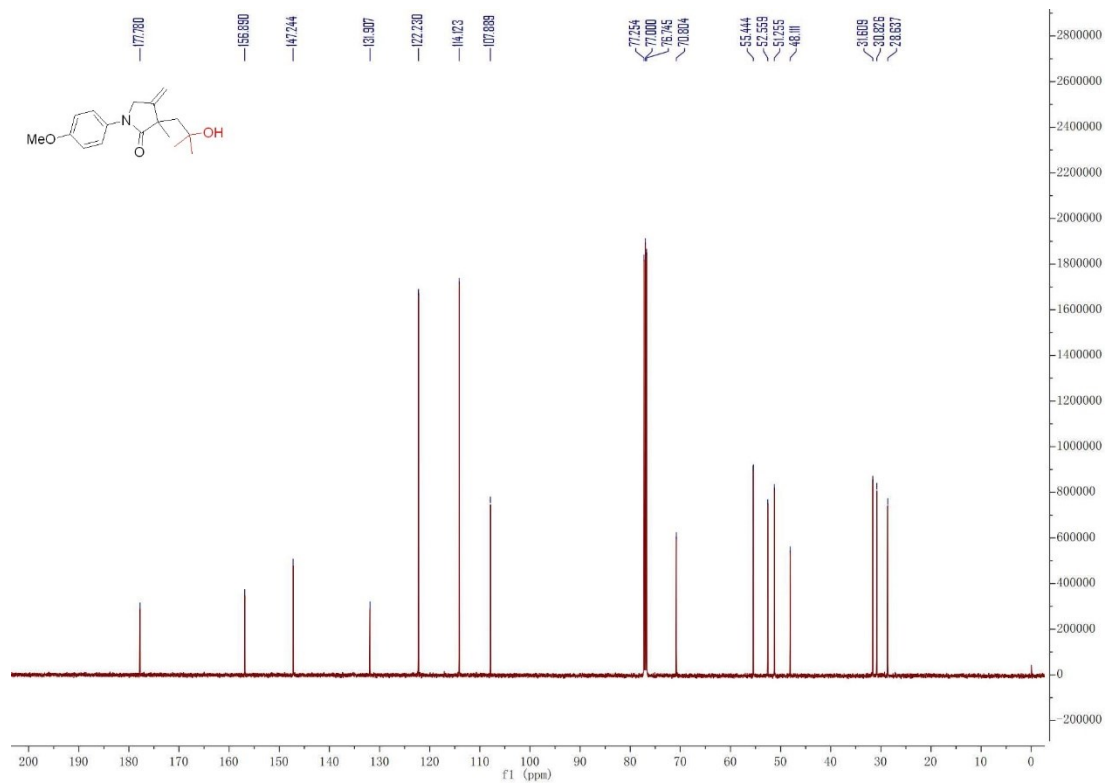

**3-(2-Hydroxy-2-methylpropyl)-3-methyl-4-methylene-1-(*p*-tolyl)pyrrolidin-2-one  
(3ca)**

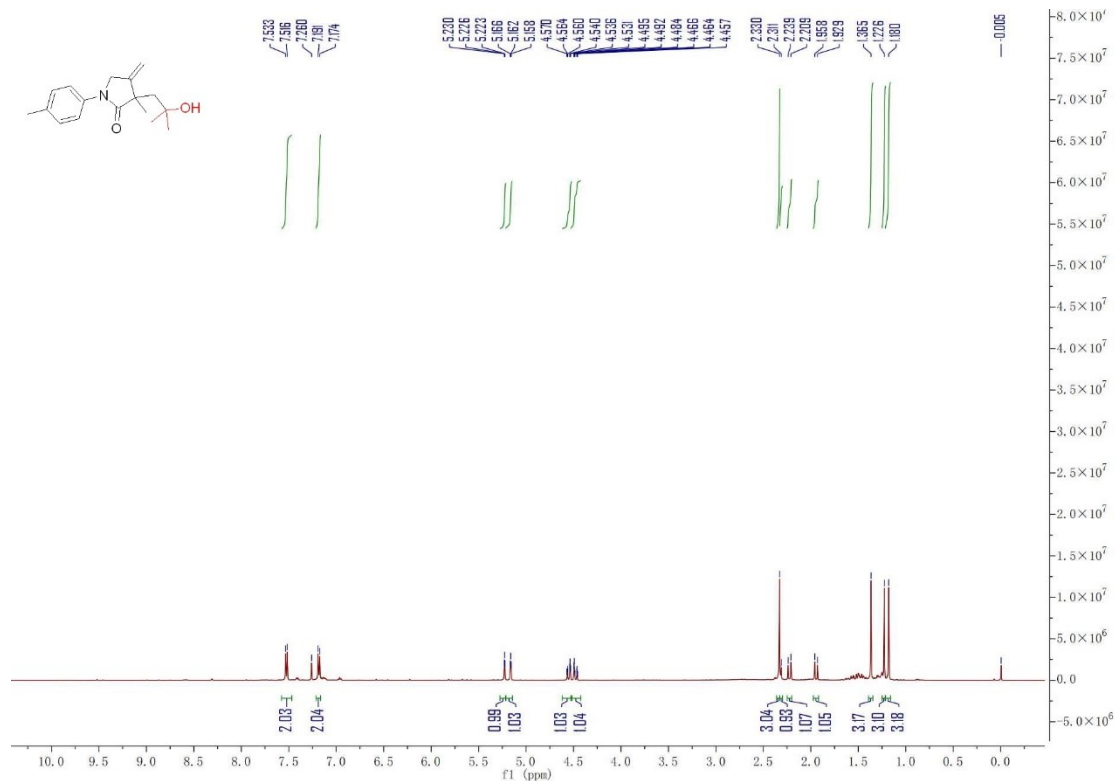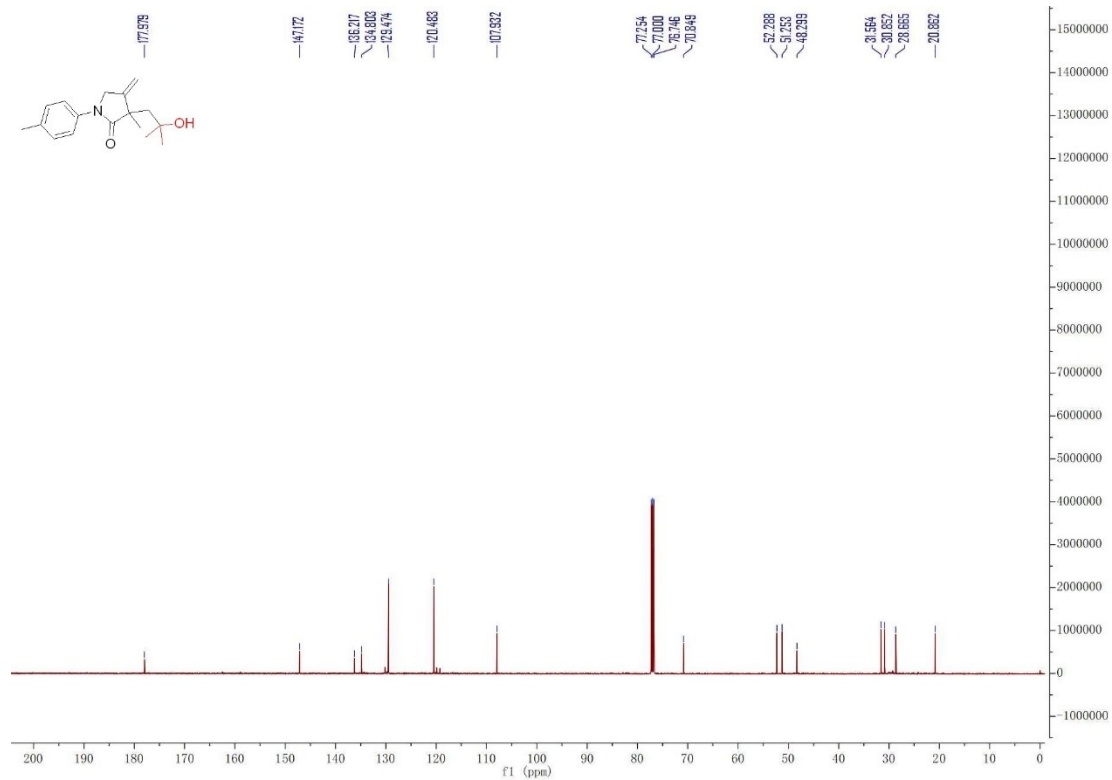

**1-(4-Butylphenyl)-3-(2-hydroxy-2-methylpropyl)-3-methyl-4-methylenepyrrolidin-2-one (3da)**

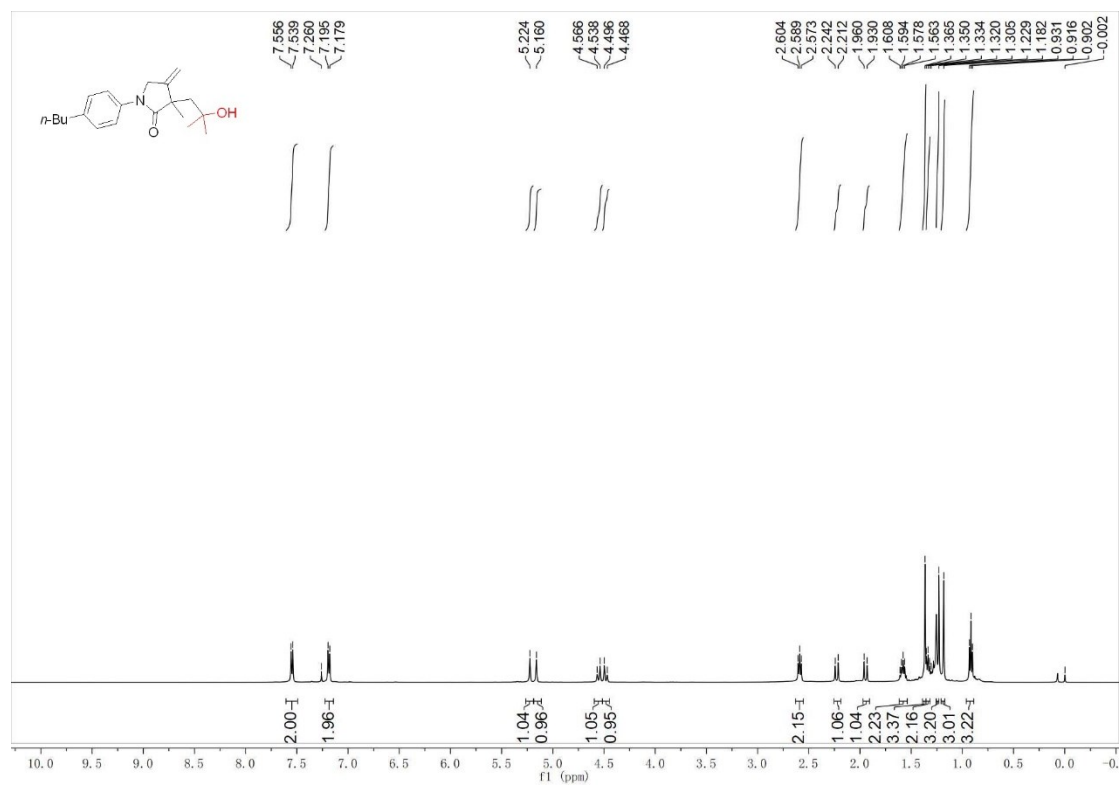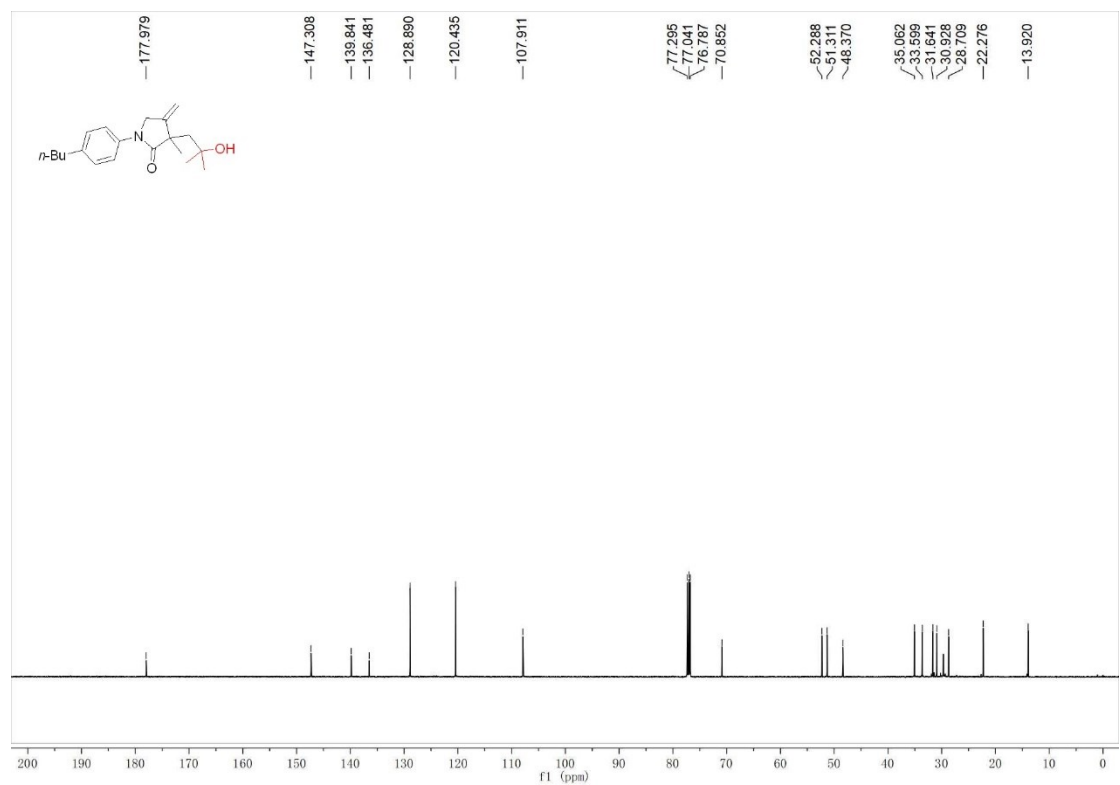

### 3-(2-Hydroxy-2-methylpropyl)-3-methyl-4-methylene-1-(4-(trifluoromethyl)phenyl)pyrrolidin-2-one (3ea)

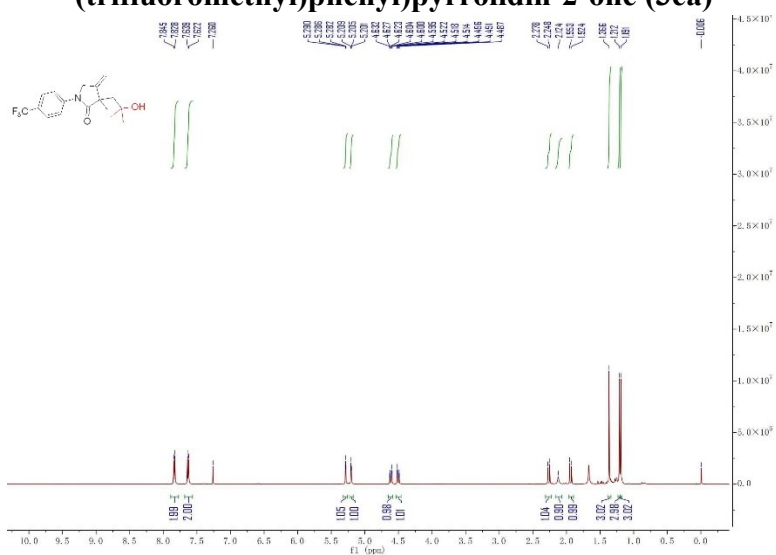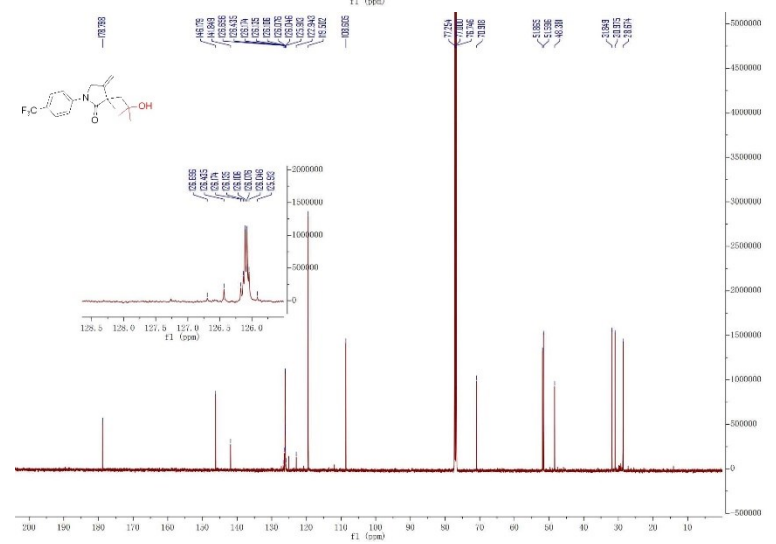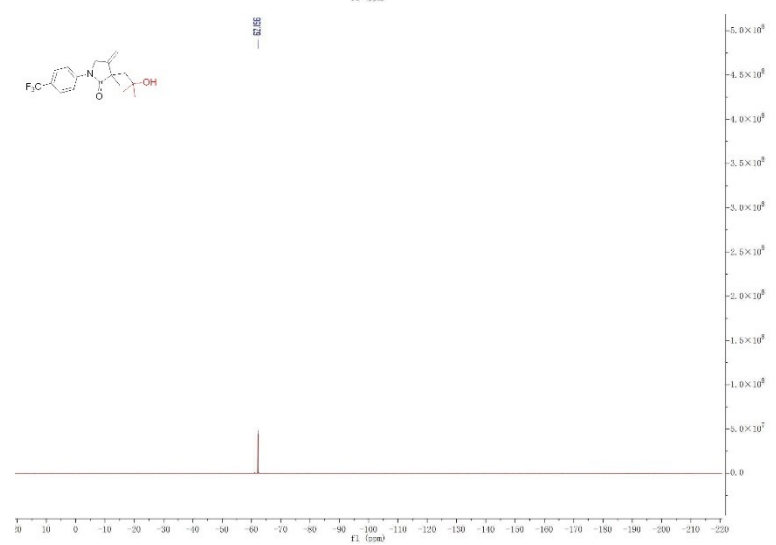

**3-(2-Hydroxy-2-methylpropyl)-3-methyl-4-methylene-1-(*m*-tolyl)pyrrolidin-2-one  
(3fa)**

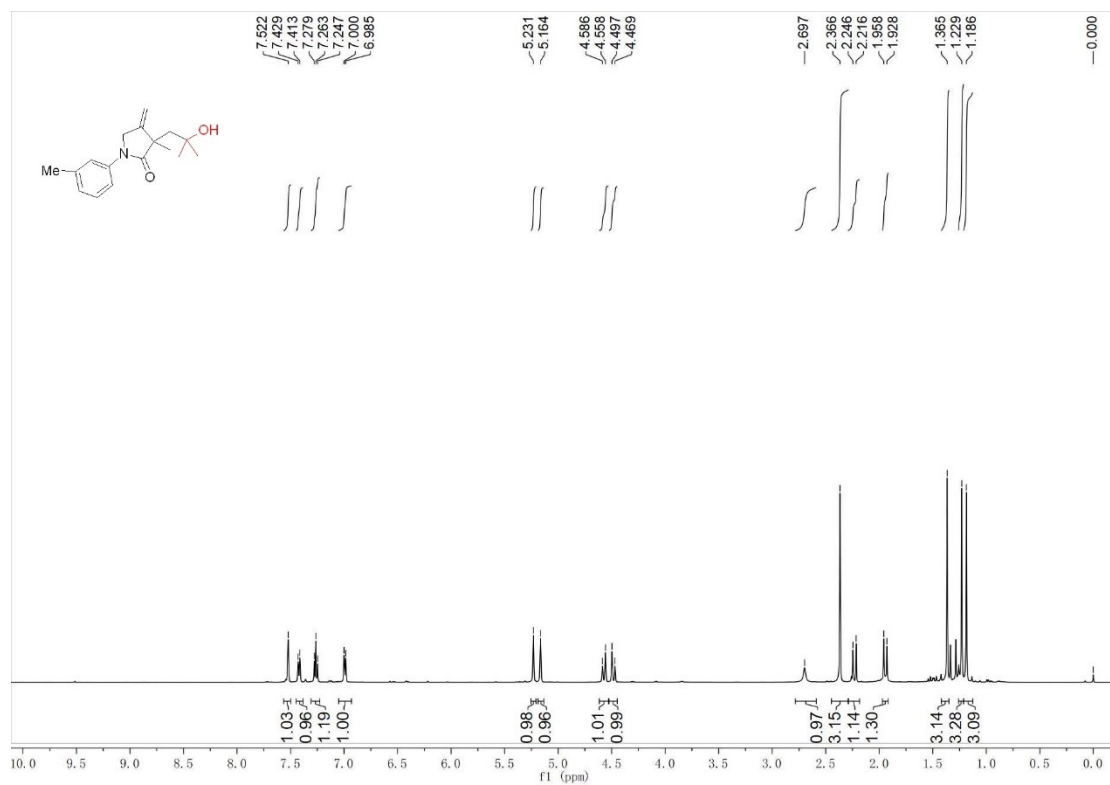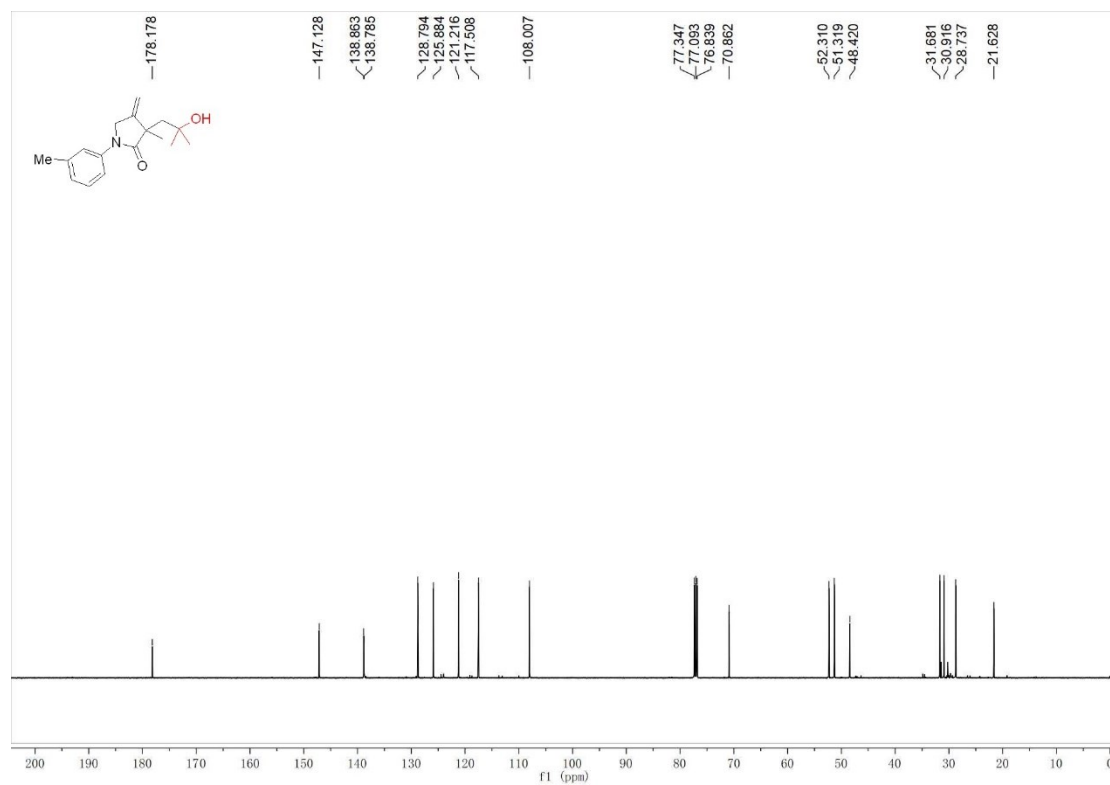

**1-(3-Chlorophenyl)-3-(2-hydroxy-2-methylpropyl)-3-methyl-4-methylenepyrrolidin-2-one (3ga)**

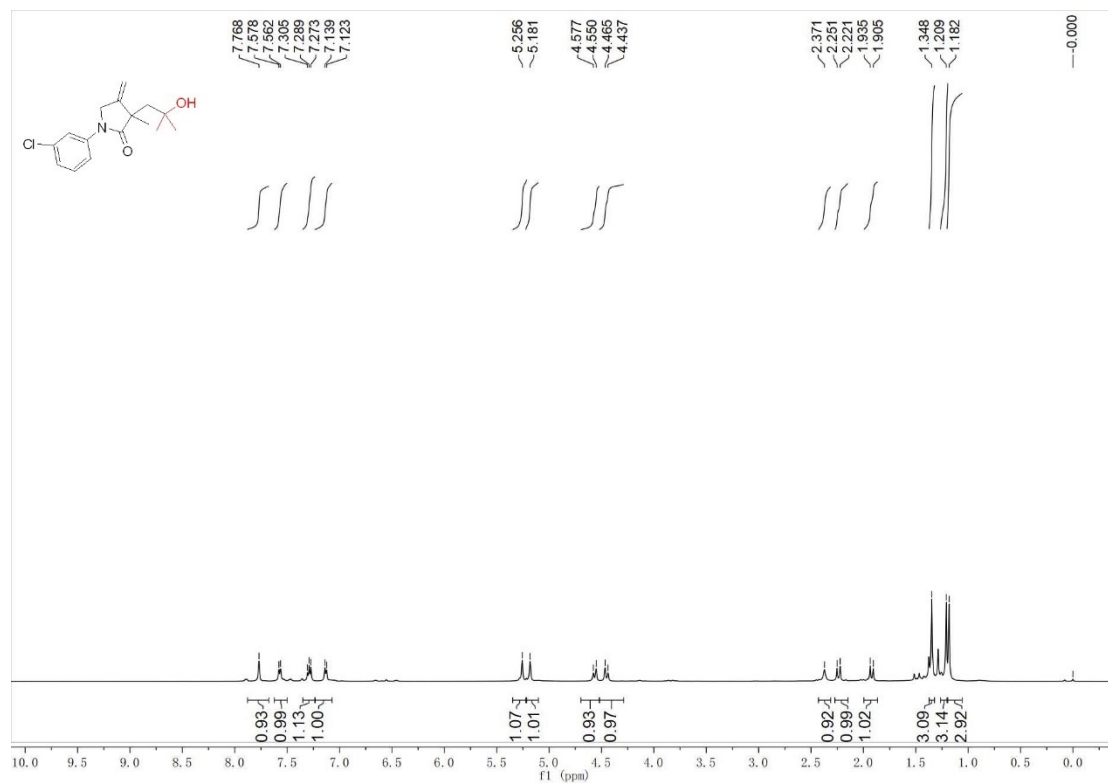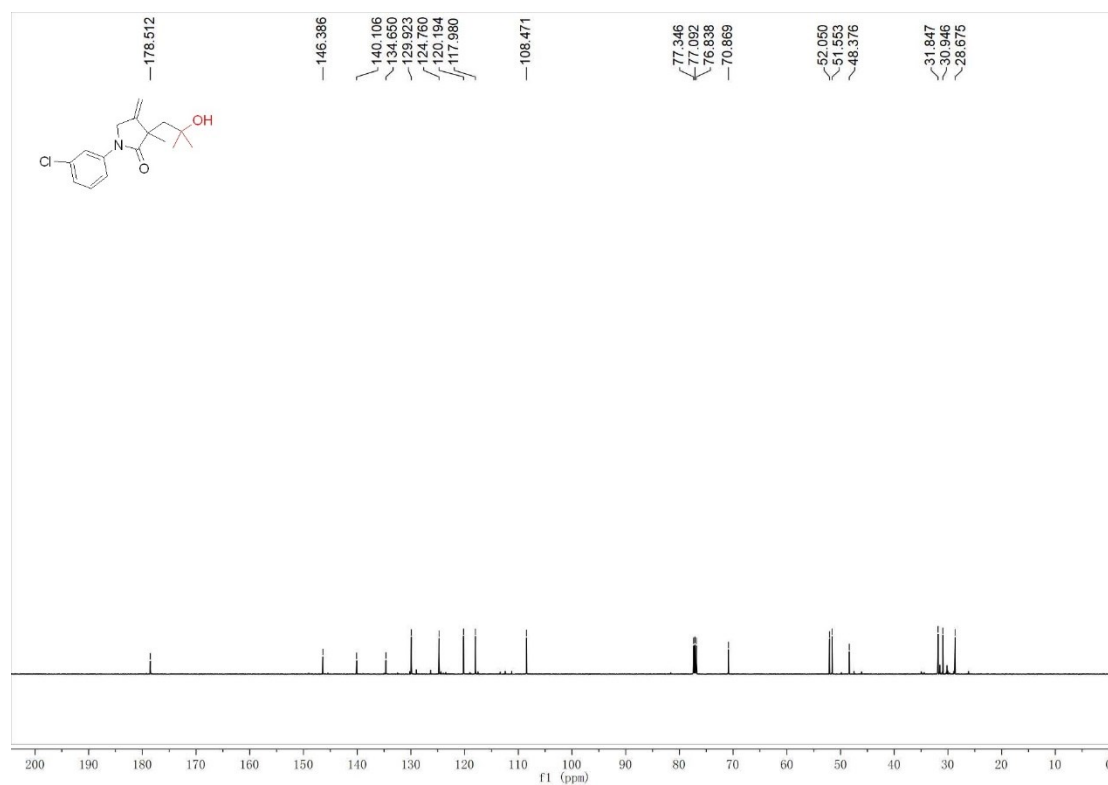

**1-Benzyl-3-(2-hydroxy-2-methylpropyl)-3-methyl-4-methylenepyrrolidin-2-one  
(3ha)**

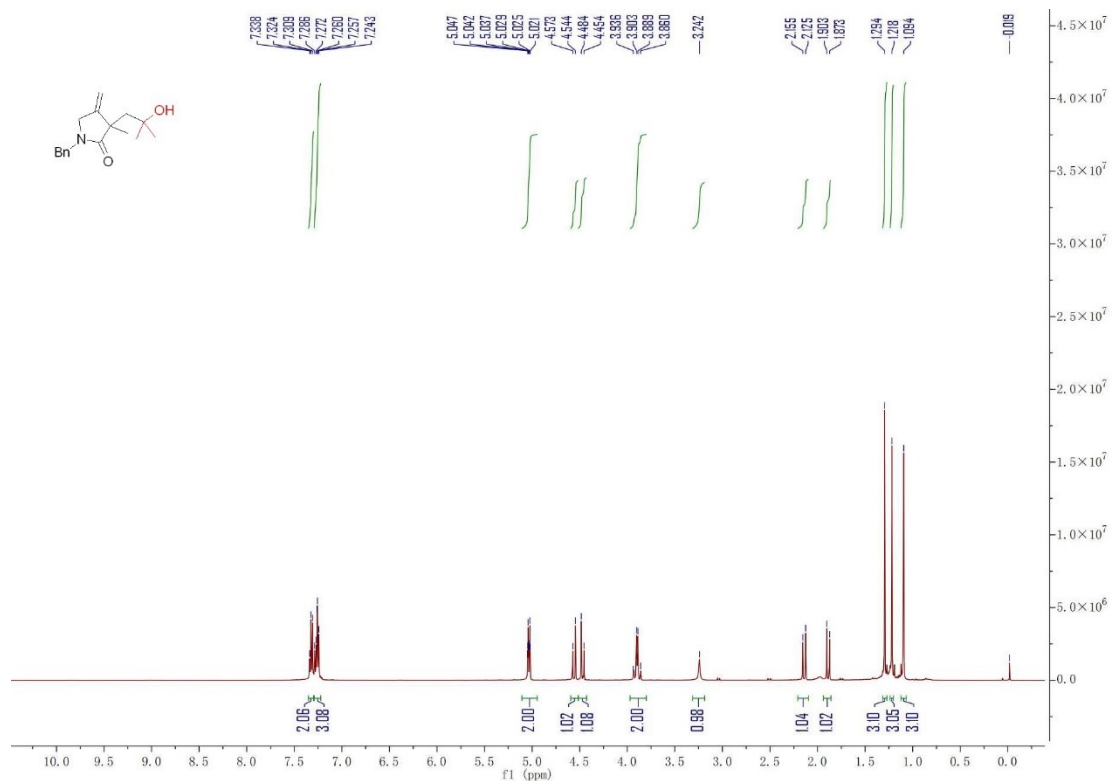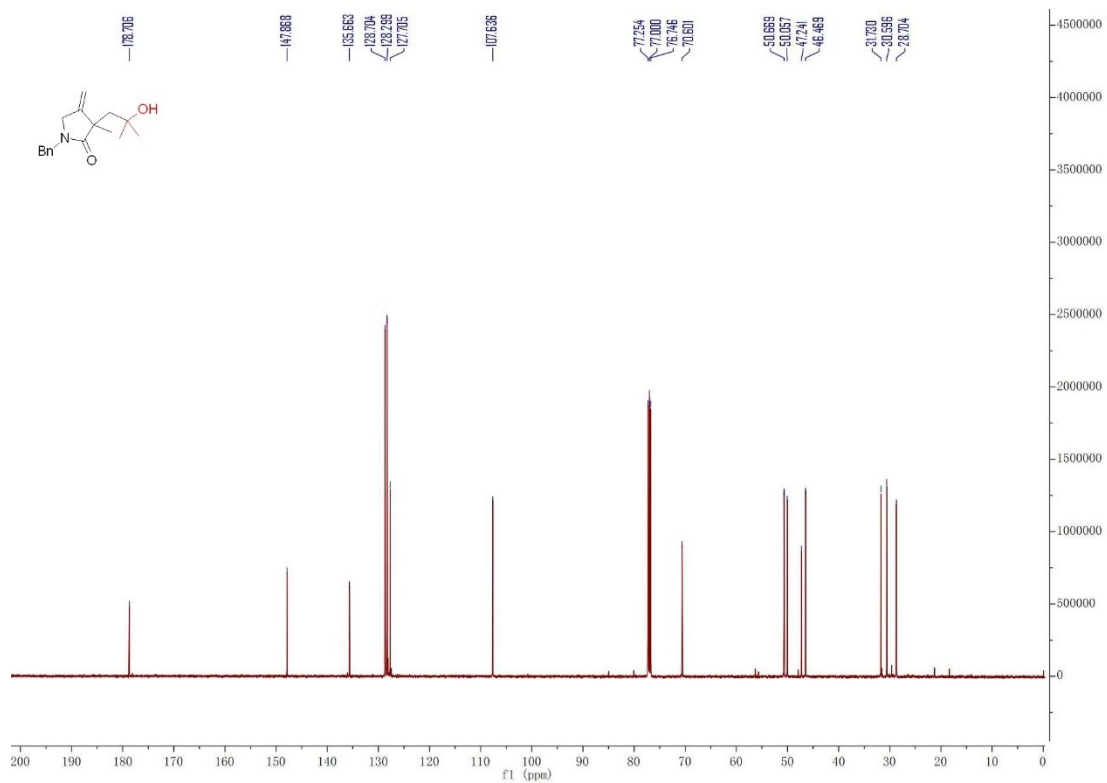

**3-Benzyl-3-(2-hydroxy-2-methylpropyl)-4-methylene-1-phenylpyrrolidin-2-one (3ia)**

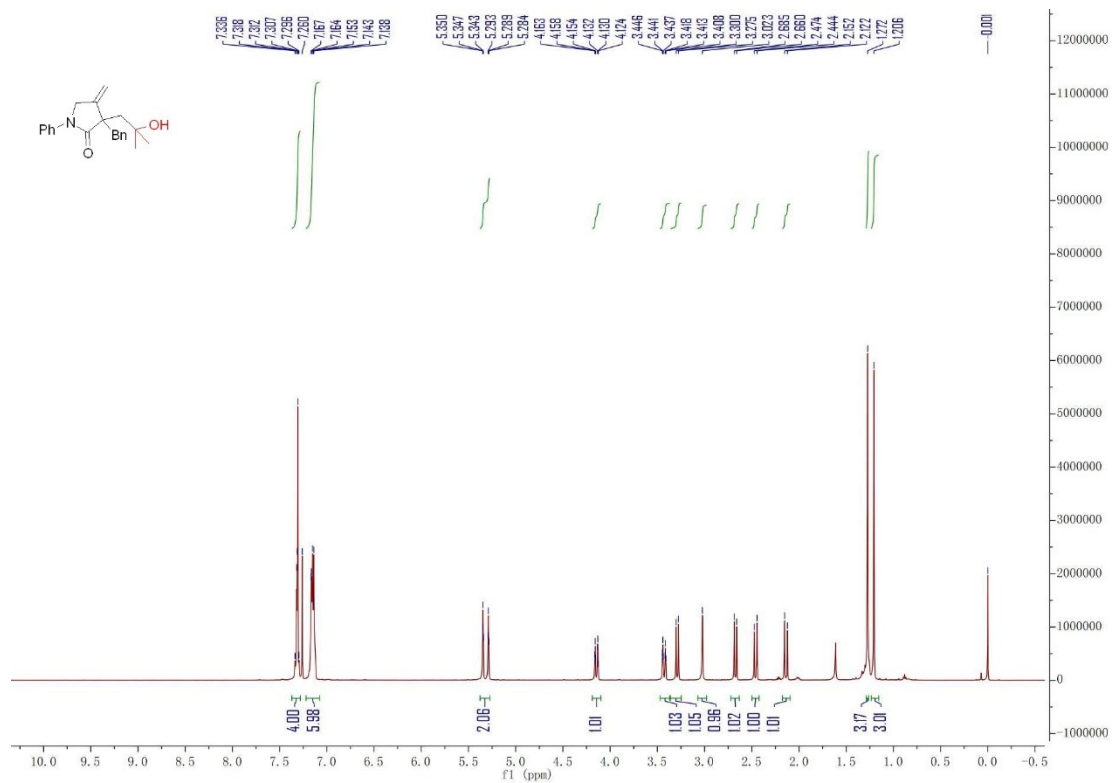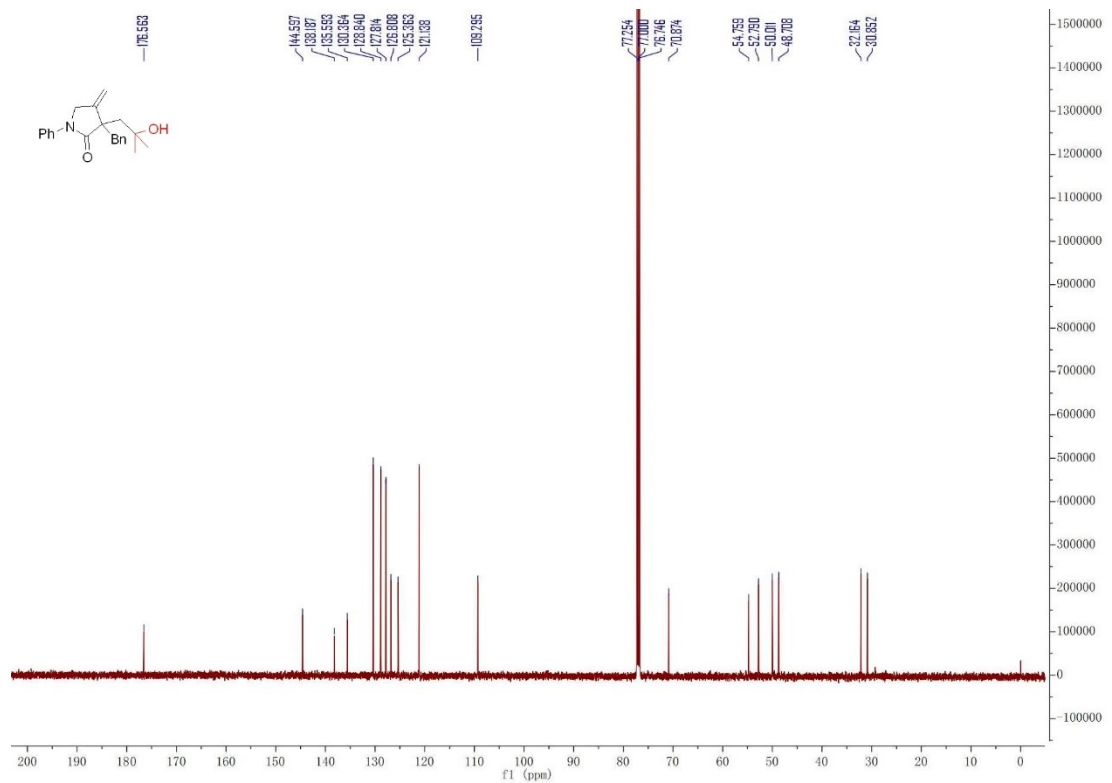



**1-(4-Butylphenyl)-3-(2-hydroxypropyl)-3-methyl-4-methylenepyrrolidin-2-one  
(3db)**

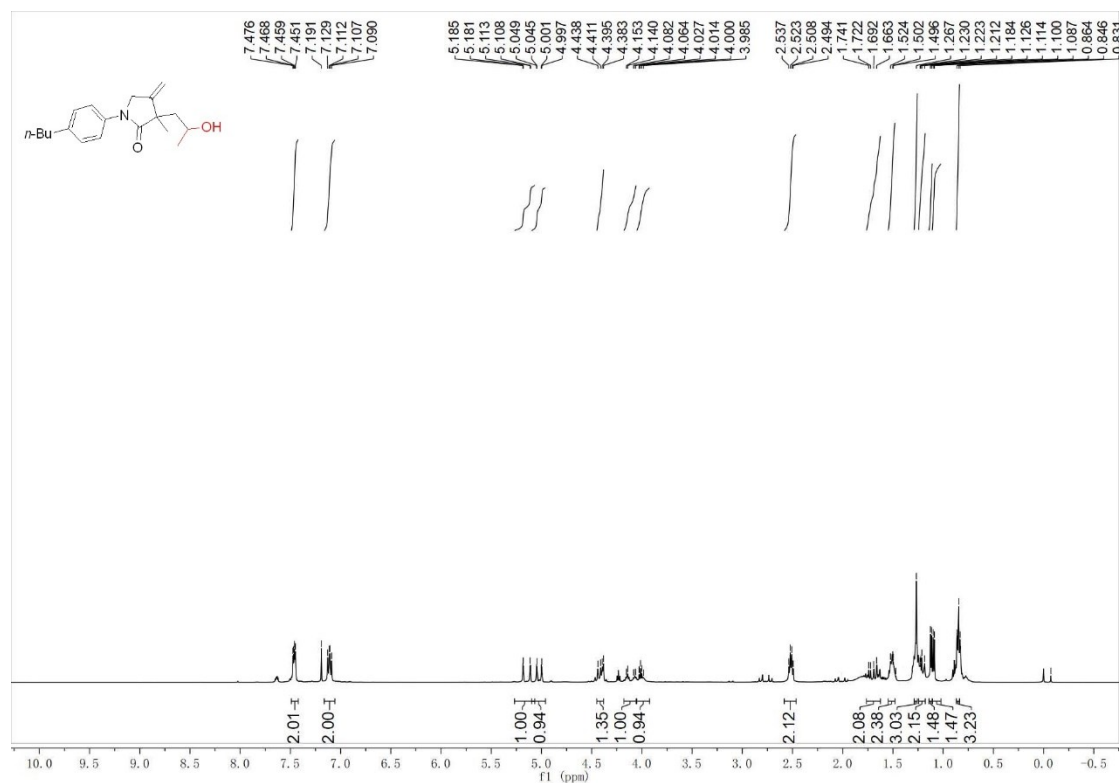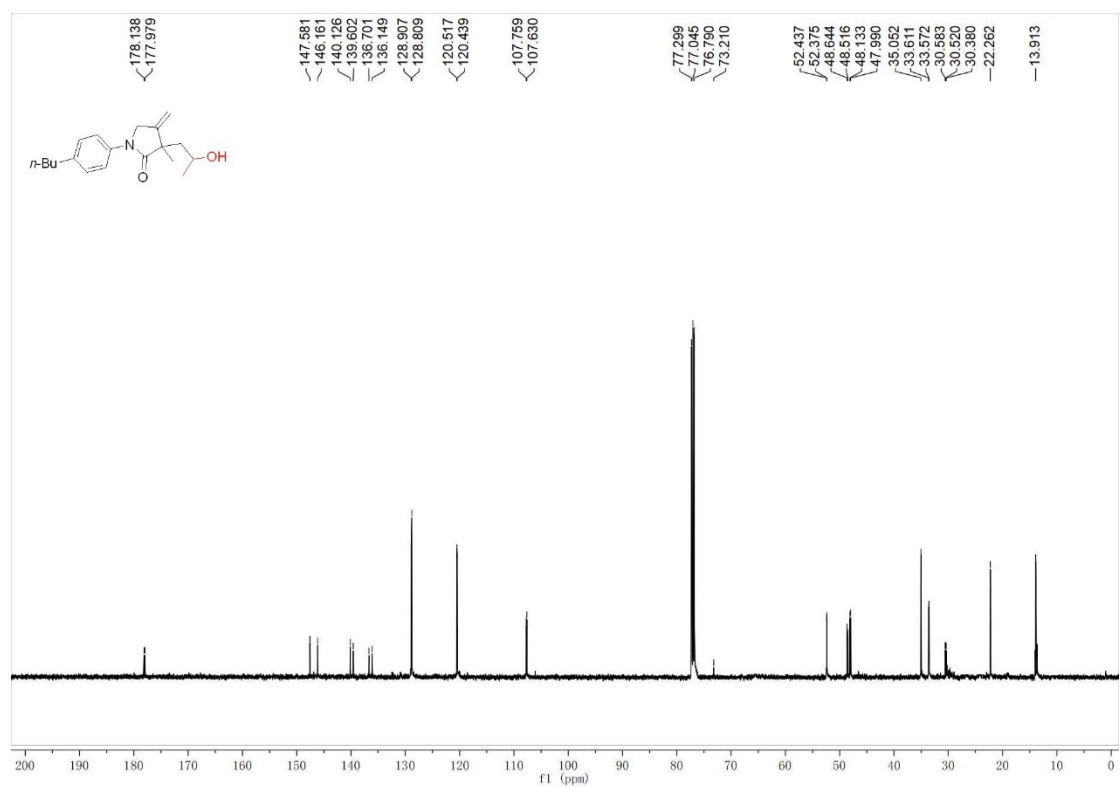

### 3-(2-Hydroxypropyl)-3-methyl-4-methylene-1-(*m*-tolyl)pyrrolidin-2-one (3fb)

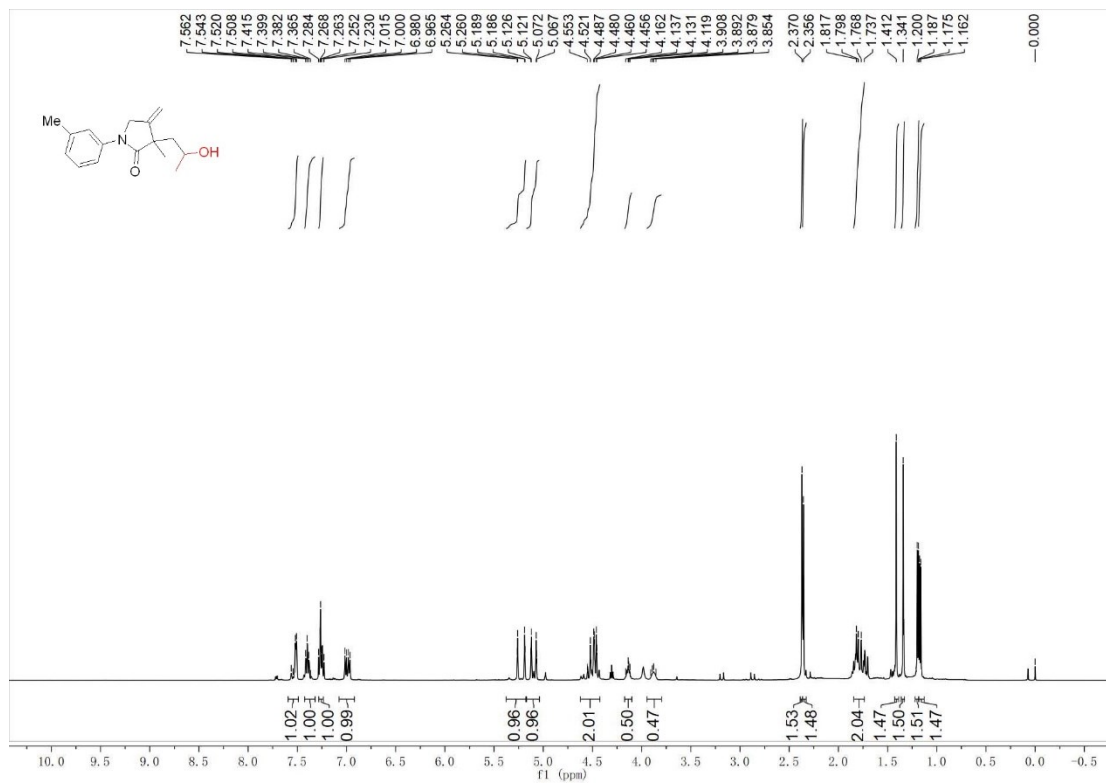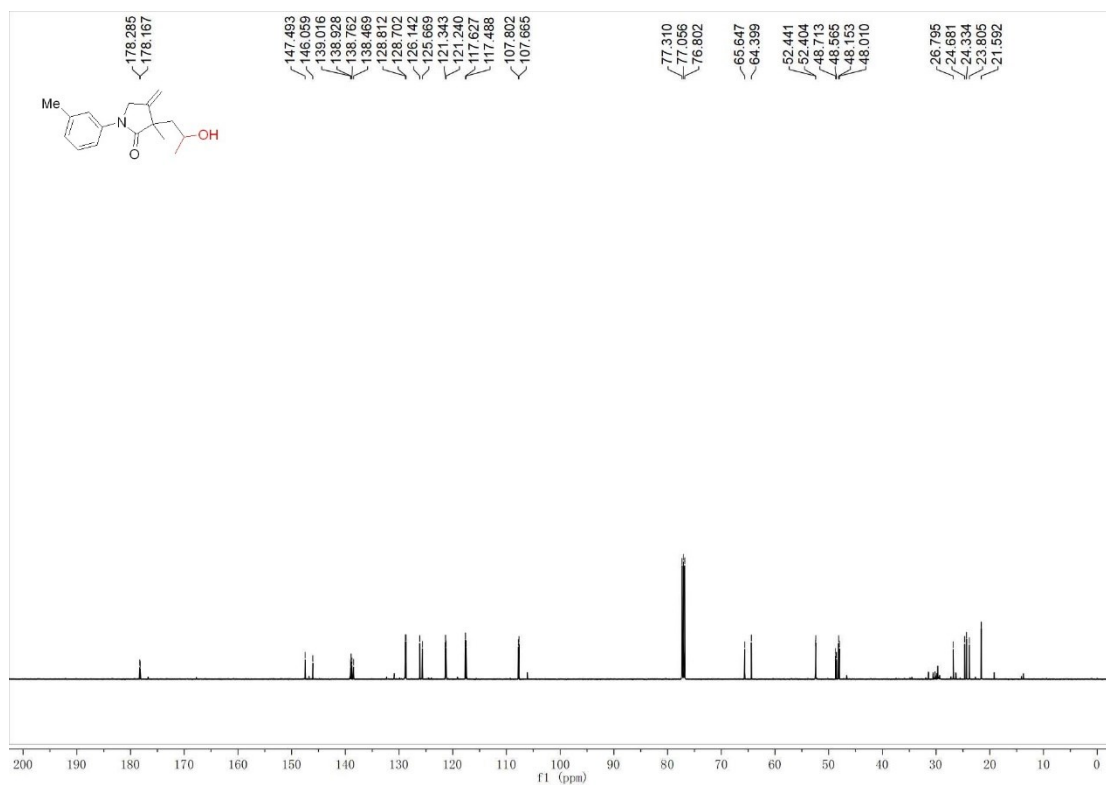

**1-(3-Chlorophenyl)-3-(2-hydroxypropyl)-3-methyl-4-methylenepyrrolidin-2-one  
(3gb)**

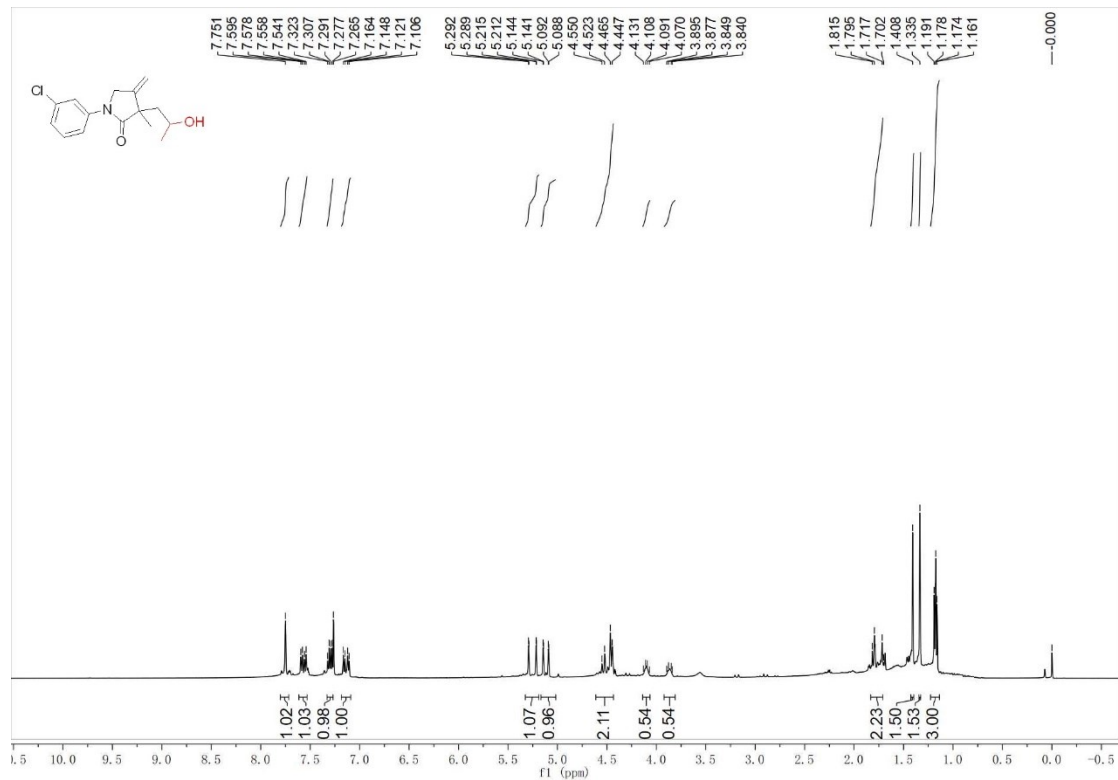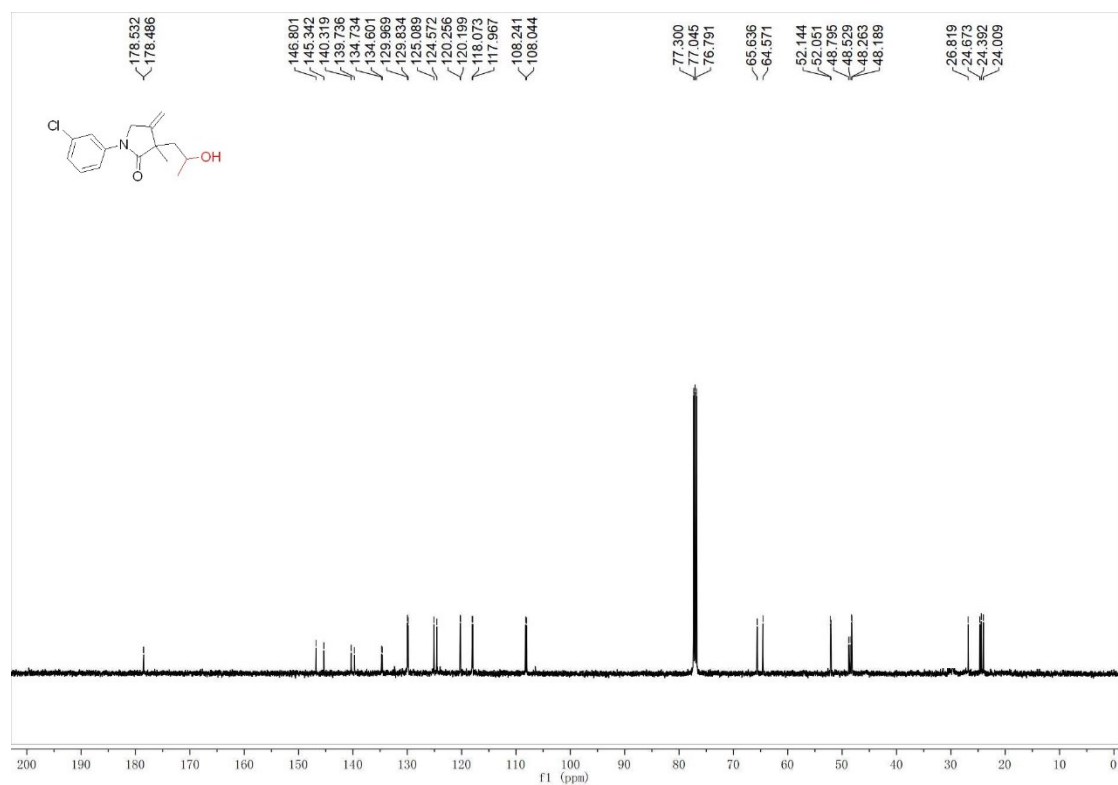

### 3-(2-Hydroxy-2-methylpropyl)-3,4-dimethyl-1-phenylpyrrolidin-2-one (5aa)

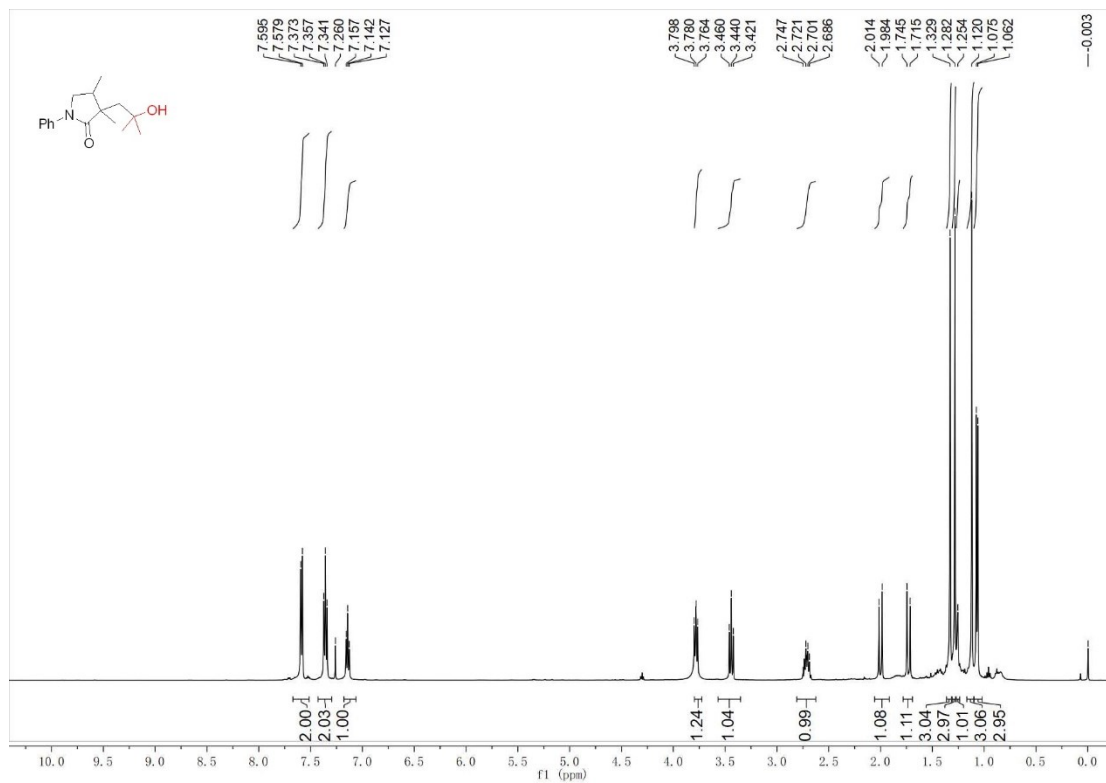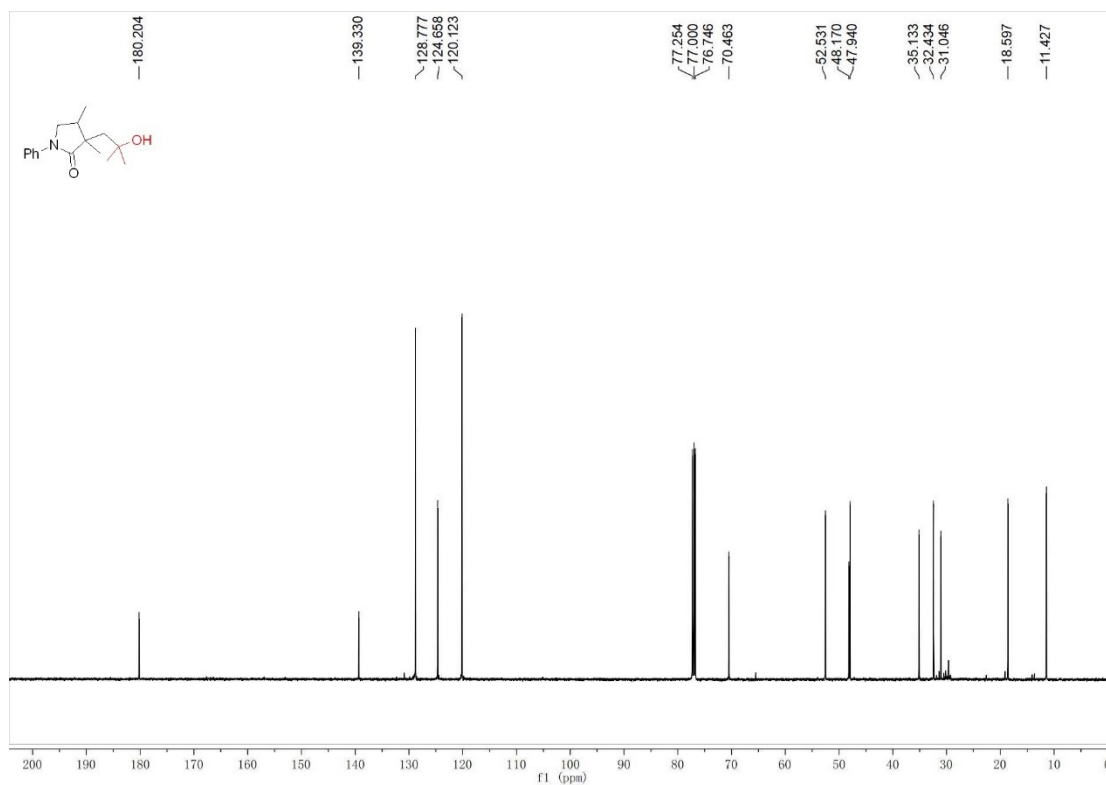

### 3-(2-Hydroxy-2-methylpropyl)-1-(4-methoxyphenyl)-3,4-dimethylpyrrolidin-2-one (5ba)

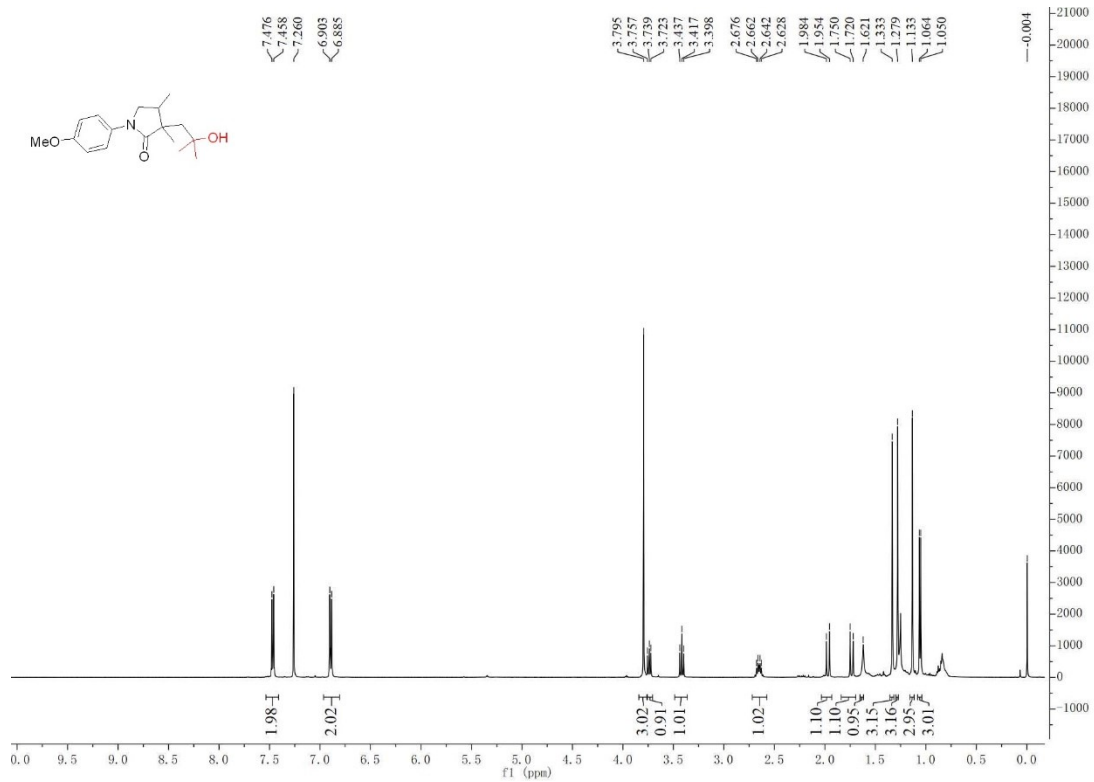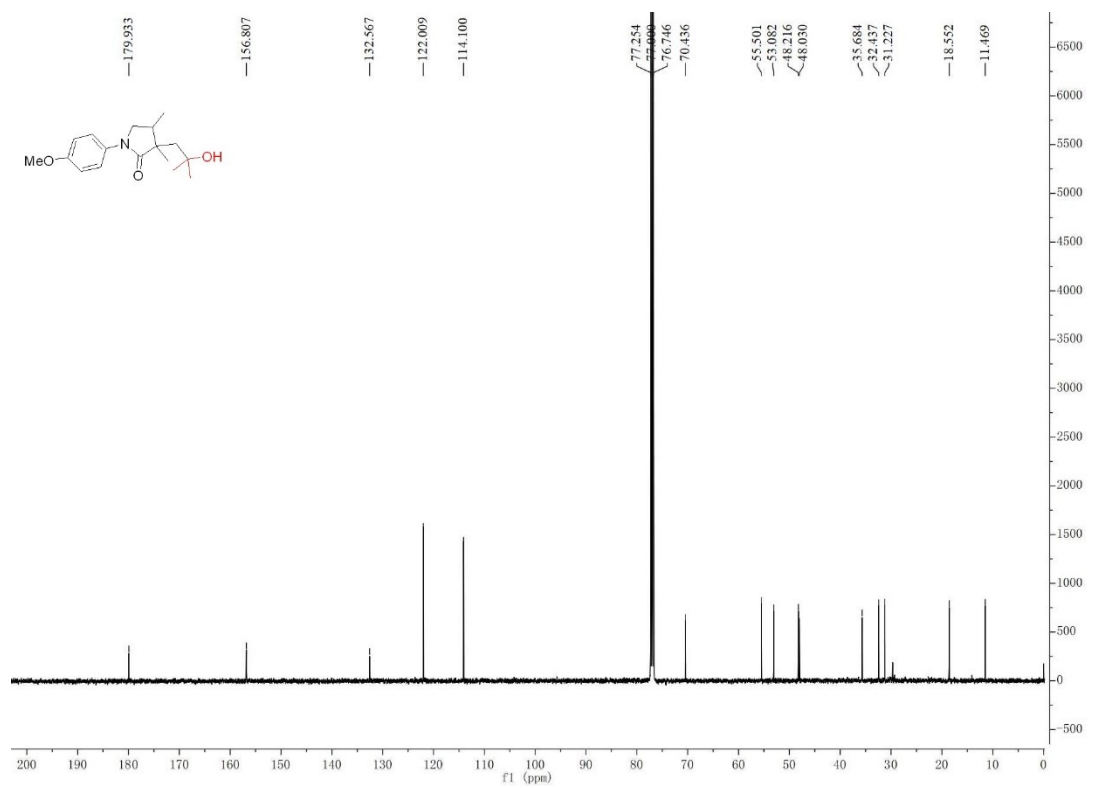

**3-(2-Hydroxy-2-methylpropyl)-3,4-dimethyl-1-(4-(trifluoromethyl)phenyl)pyrrolidin-2-one (5ca)**

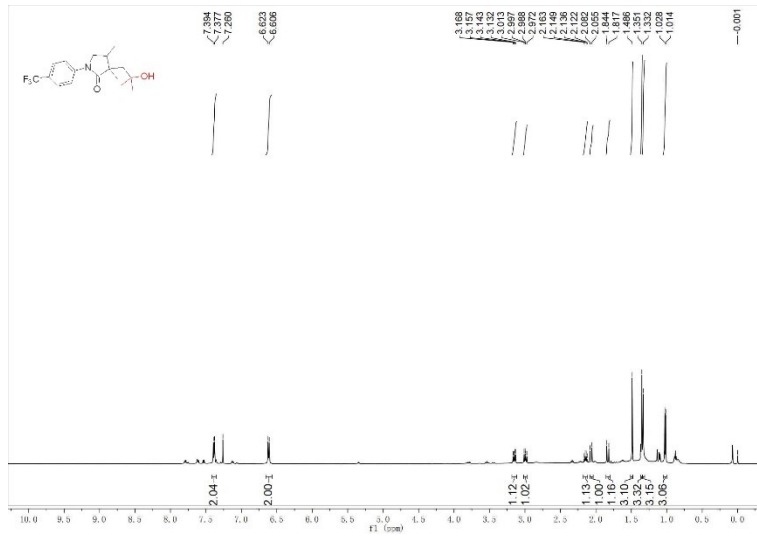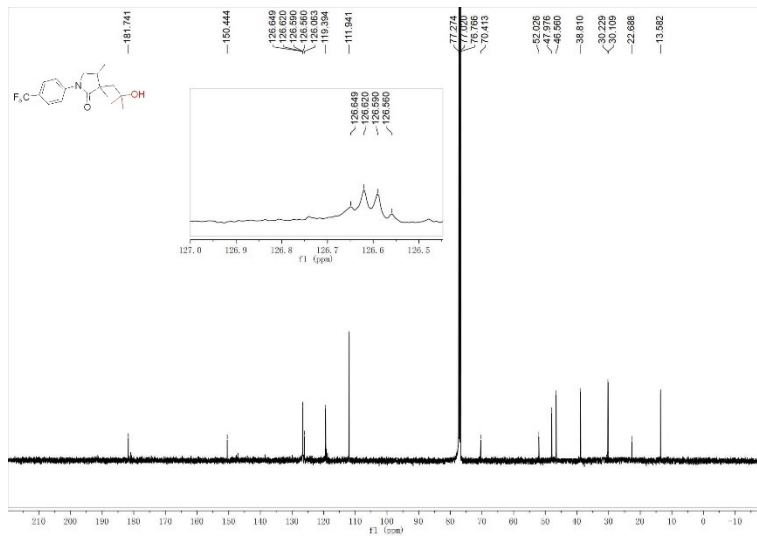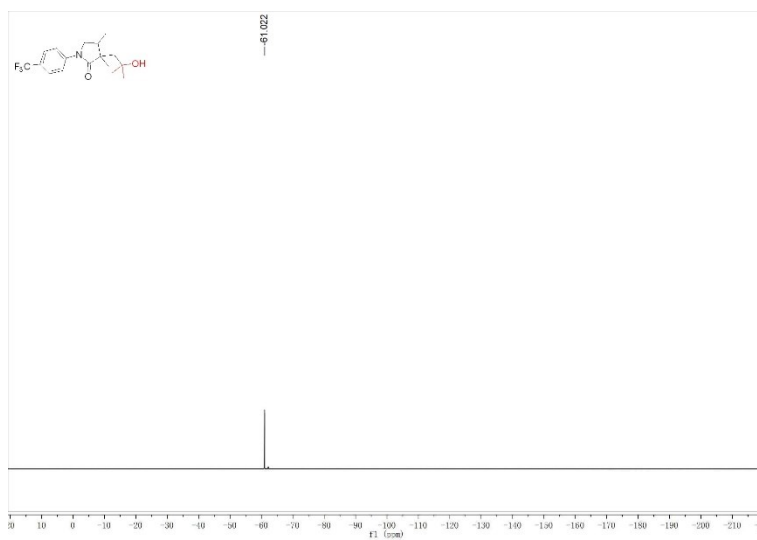

**1-(4-Bromophenyl)-3-(2-hydroxy-2-methylpropyl)-3,4,4-trimethylpyrrolidin-2-one (5da)**

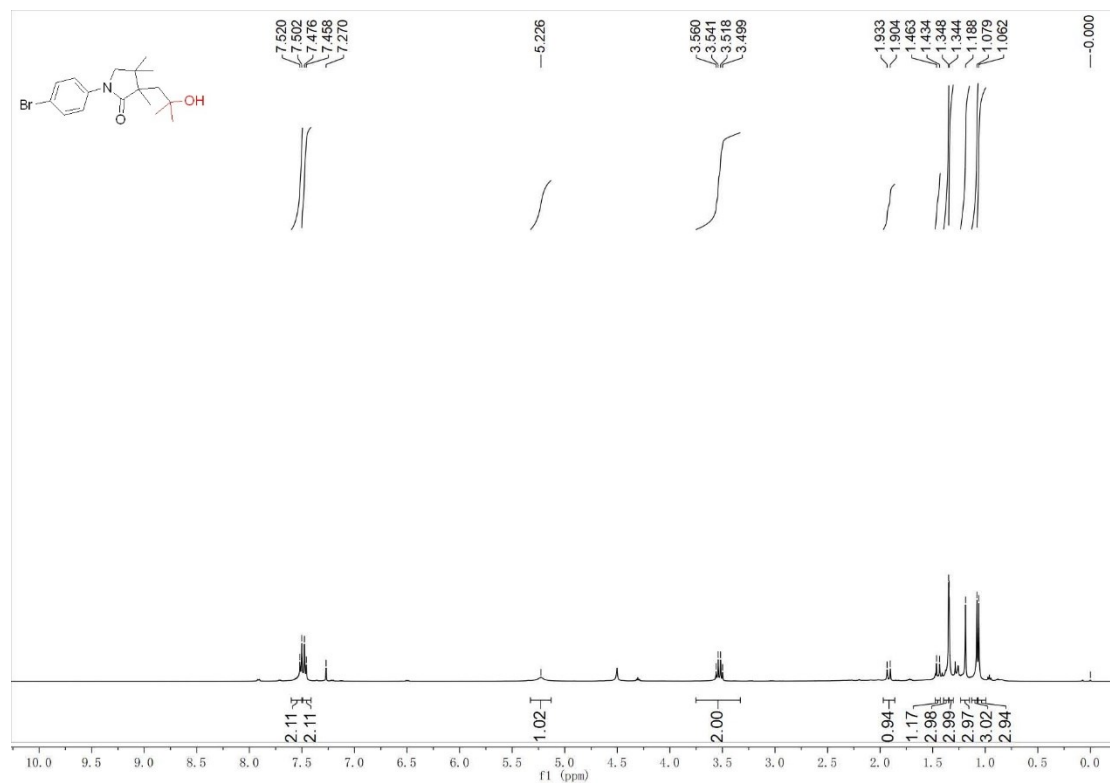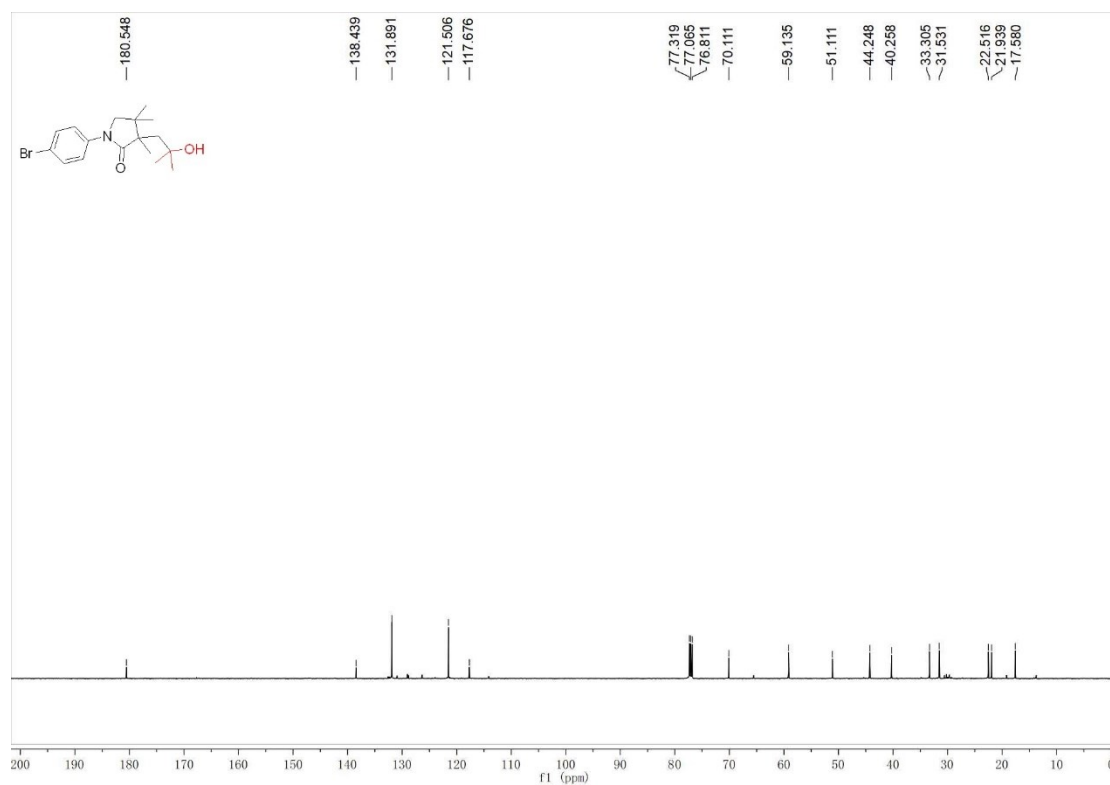

### 3-Benzyl-3-(2-hydroxy-2-methylpropyl)-4-methyl-1-phenylpyrrolidin-2-one (5ea)

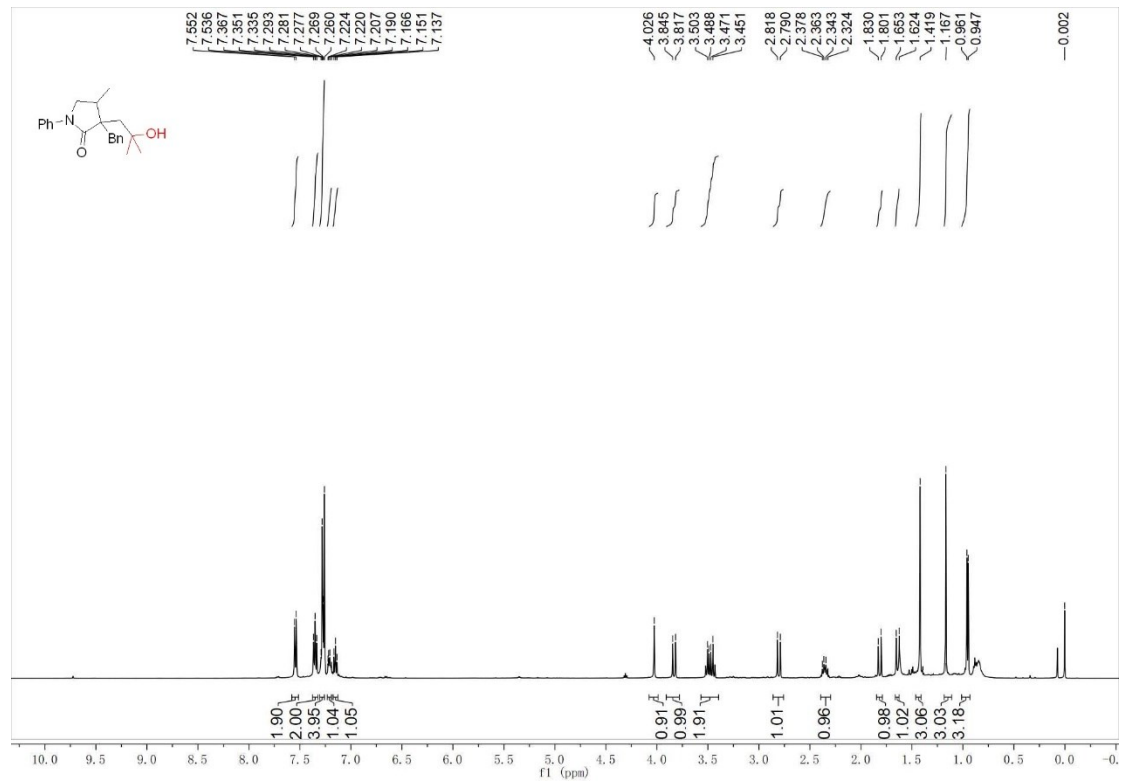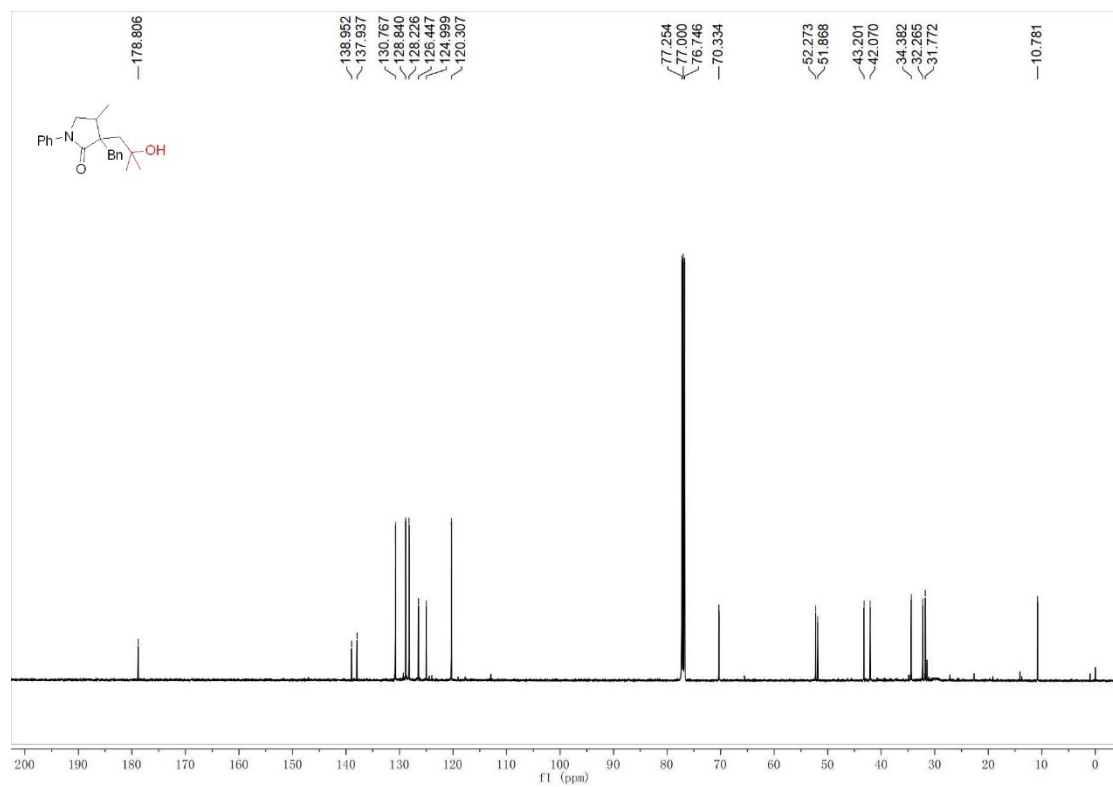



### 3,4-Dimethyl-3-(2-oxopropyl)-1-phenylpyrrolidin-2-one (6ab)

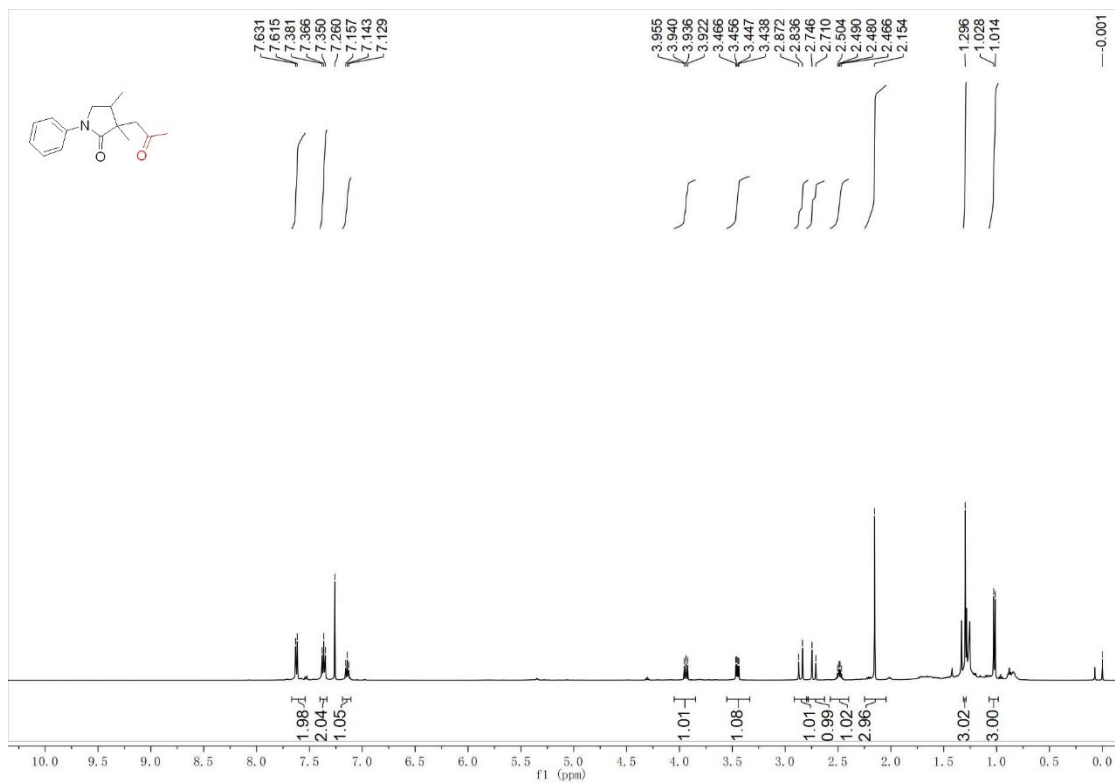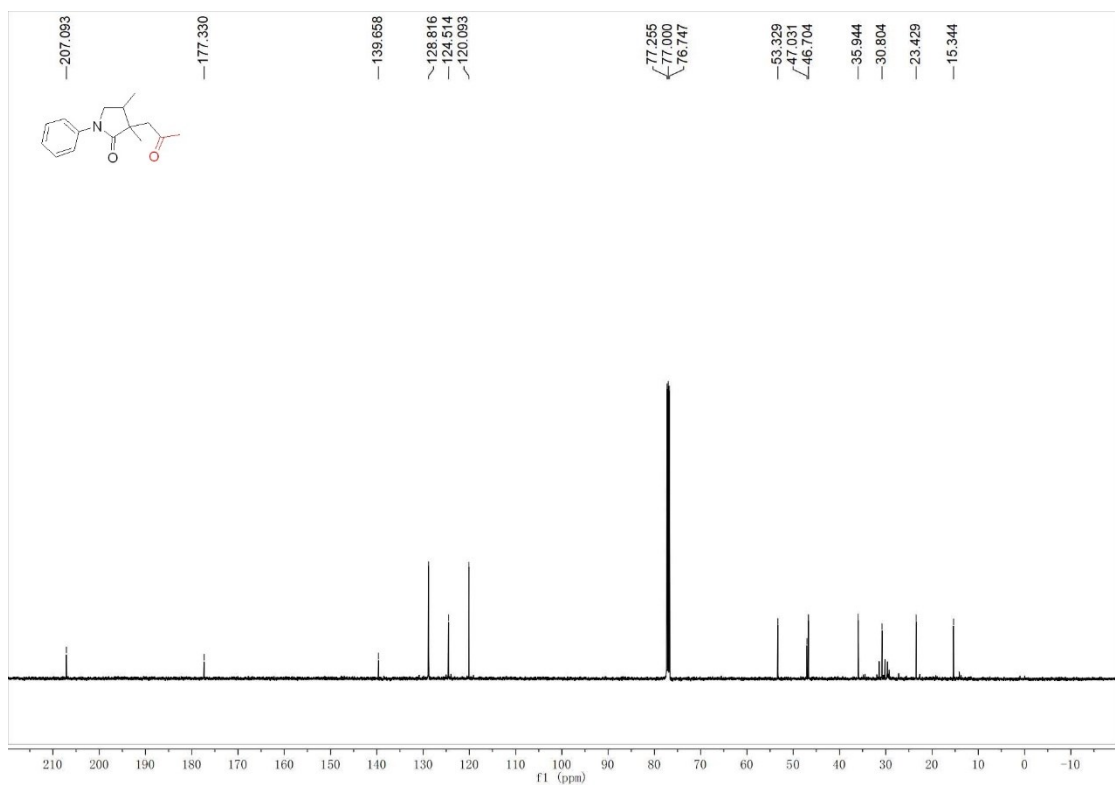

**1-(4-(*tert*-Butyl)phenyl)-3,4-dimethyl-3-(2-oxopropyl)pyrrolidin-2-one (6fb)**

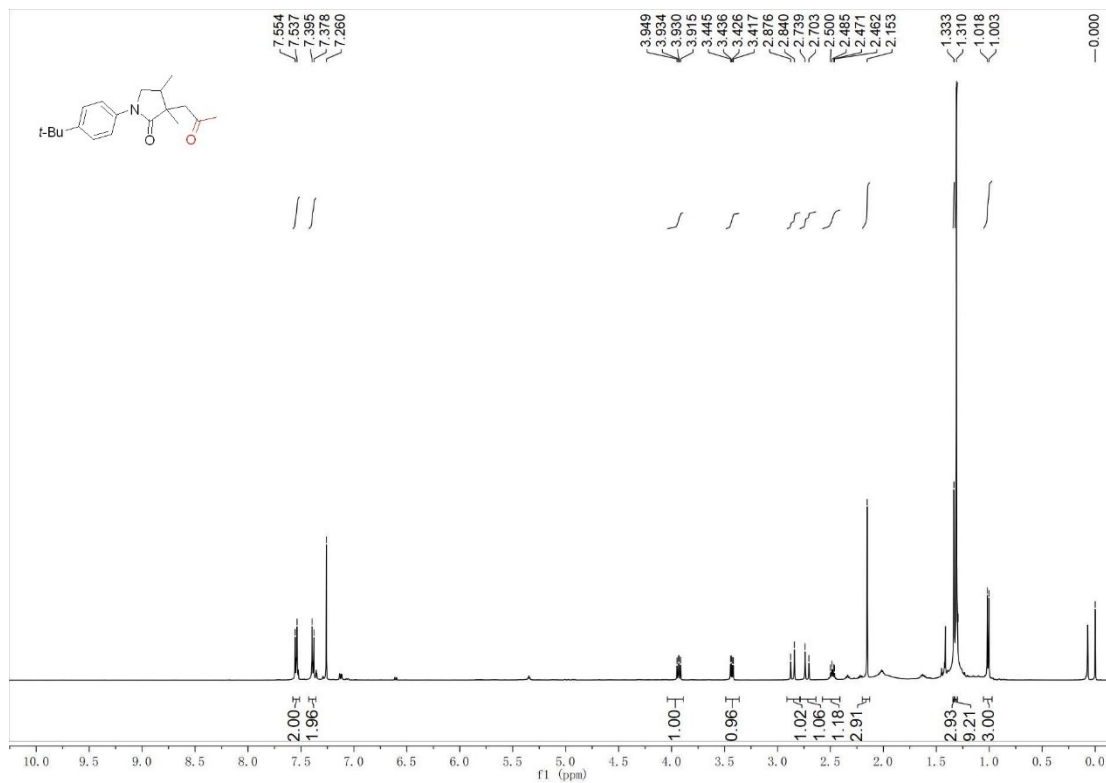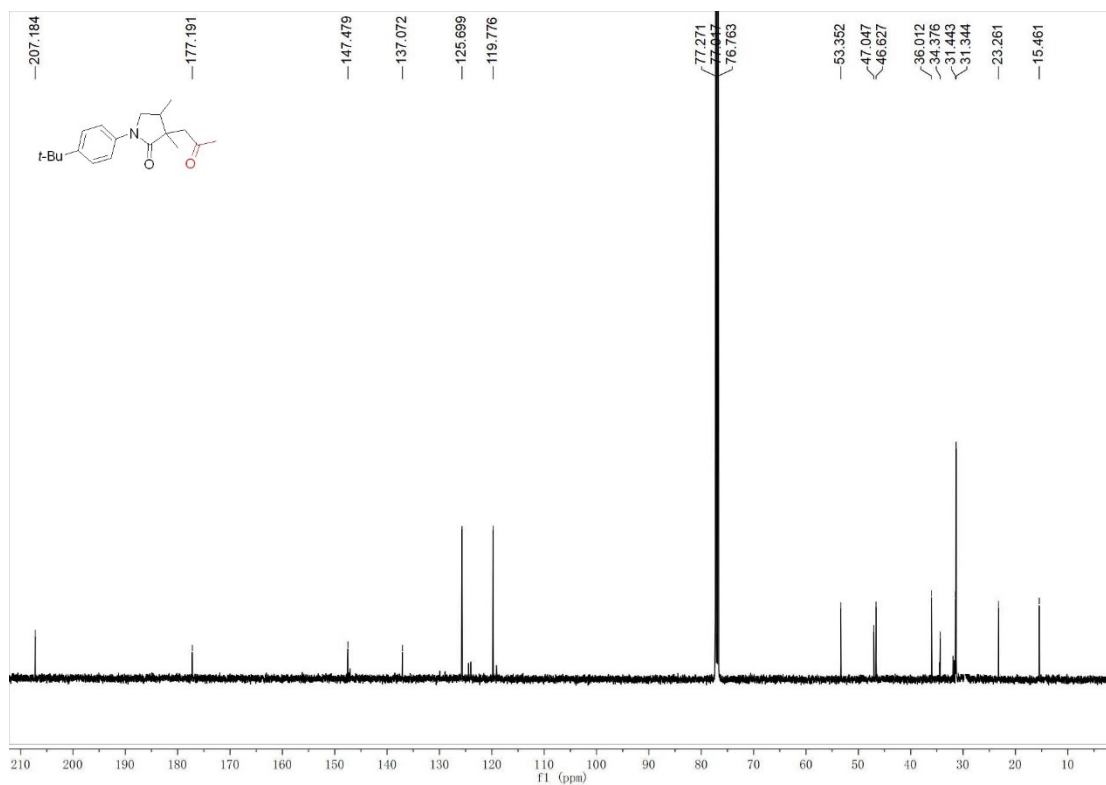

**3,4-Dimethyl-3-(2-oxopropyl)-1-(4-(trifluoromethyl)phenyl)pyrrolidin-2-one (6cb)**

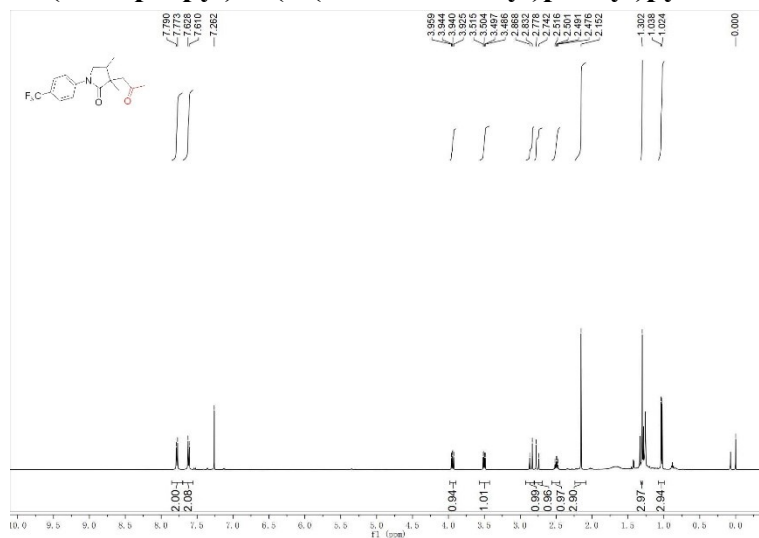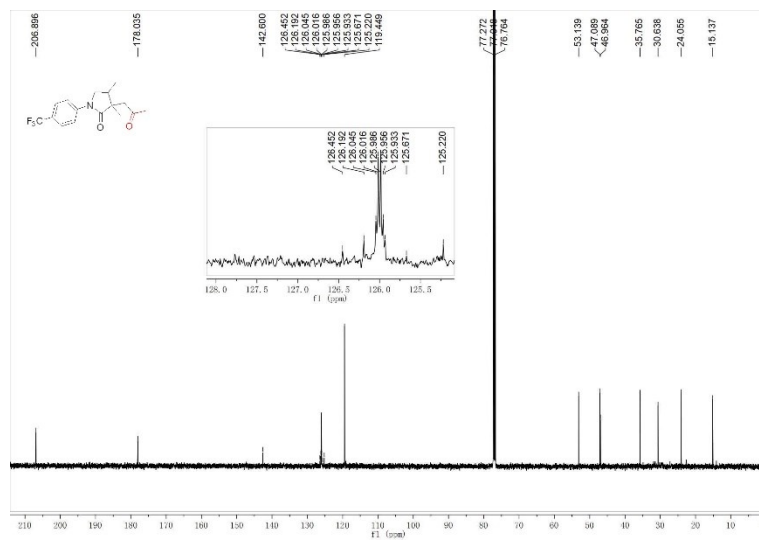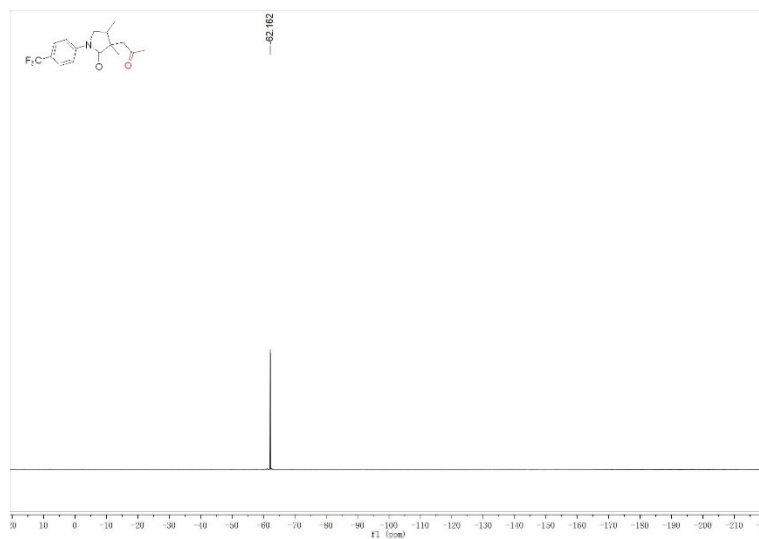

### 3,4-Dimethyl-3-(2-oxopropyl)-1-(*m*-tolyl)pyrrolidin-2-one (6gb)

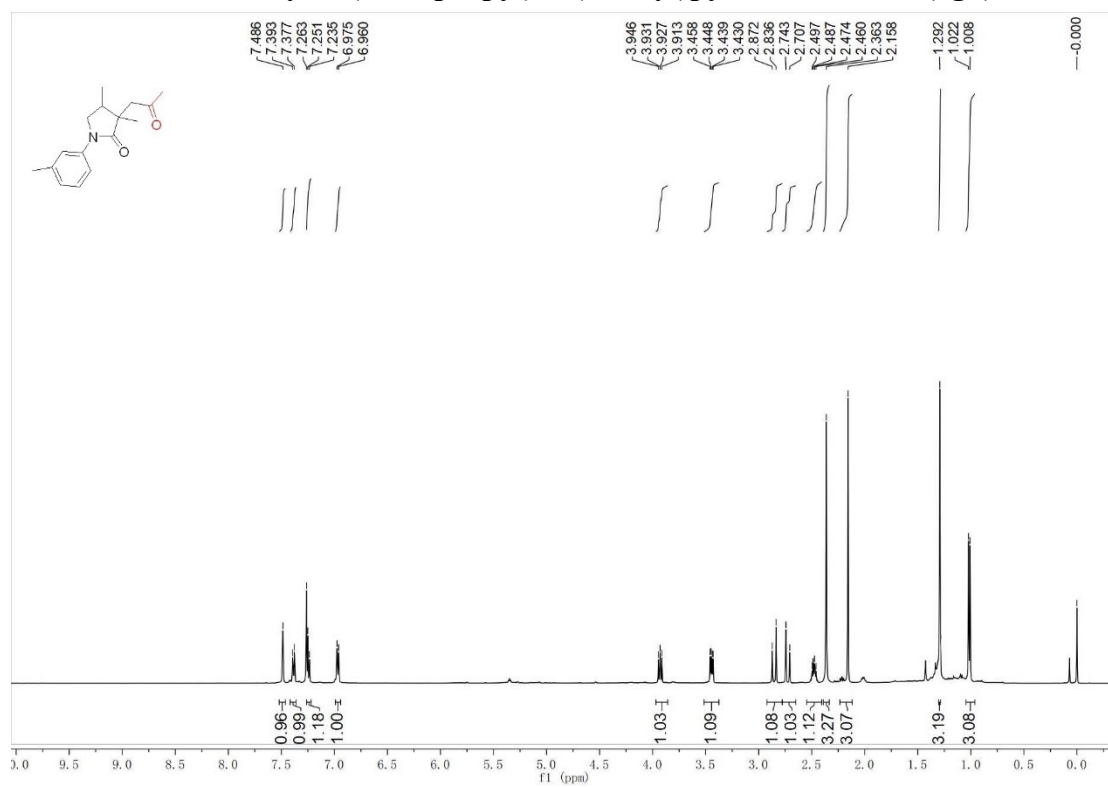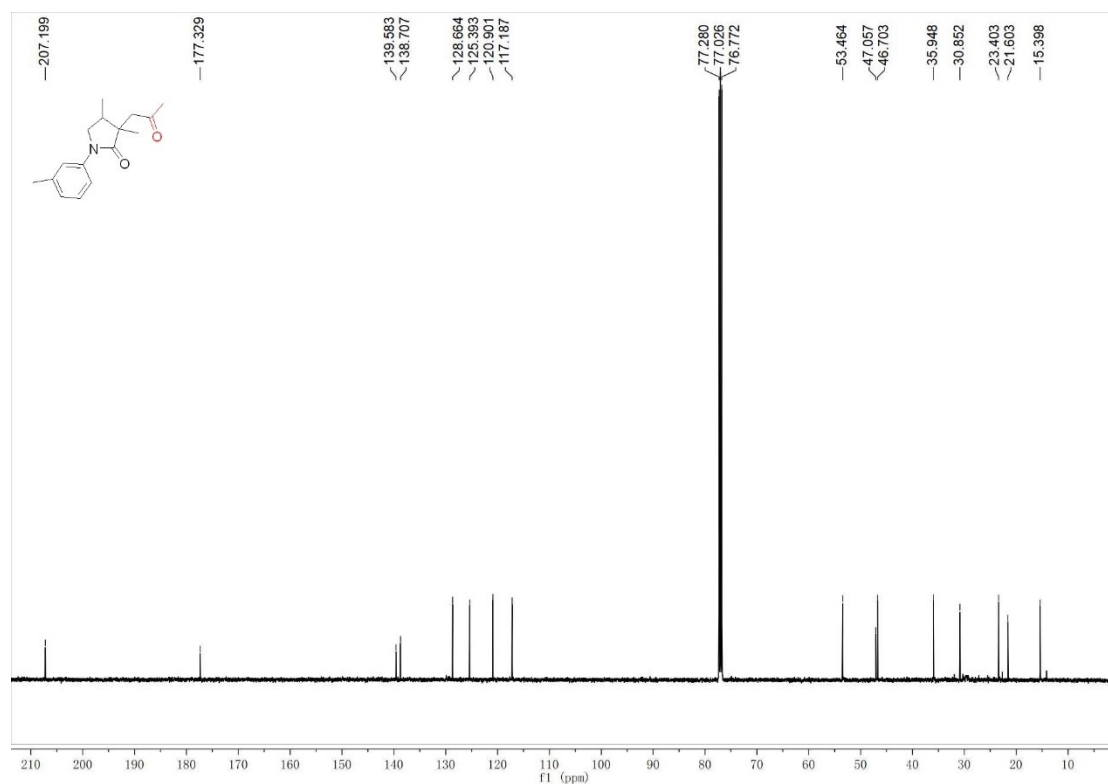

**1-(4-Bromophenyl)-3,4,4-trimethyl-3-(2-oxopropyl)pyrrolidin-2-one (6db)**

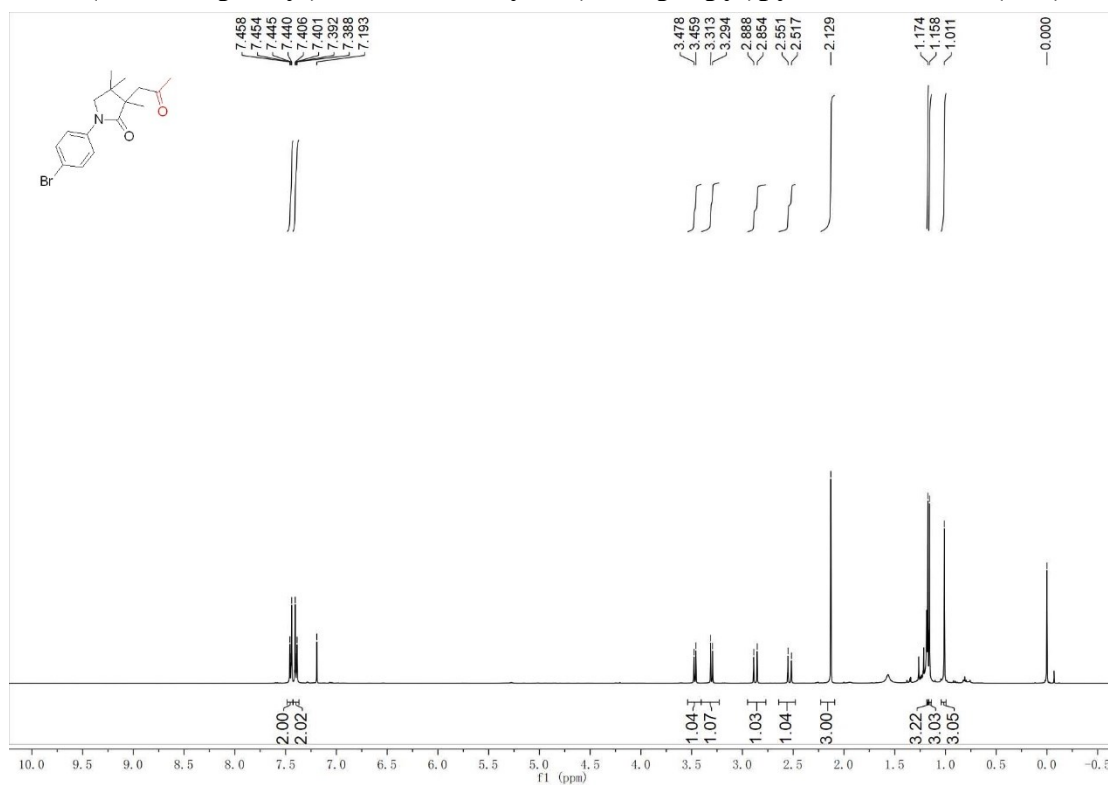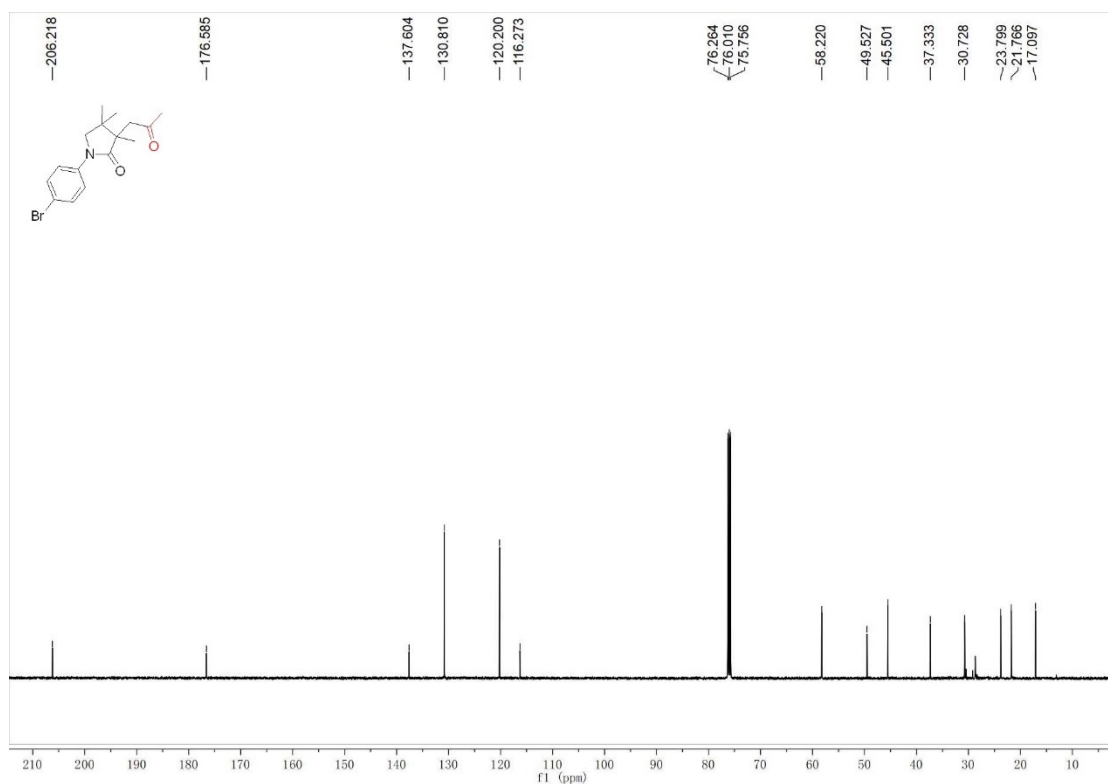

**3-(2,2-Dimethoxyethyl)-3,4-dimethyl-1-phenylpyrrolidin-2-one (7ac)**

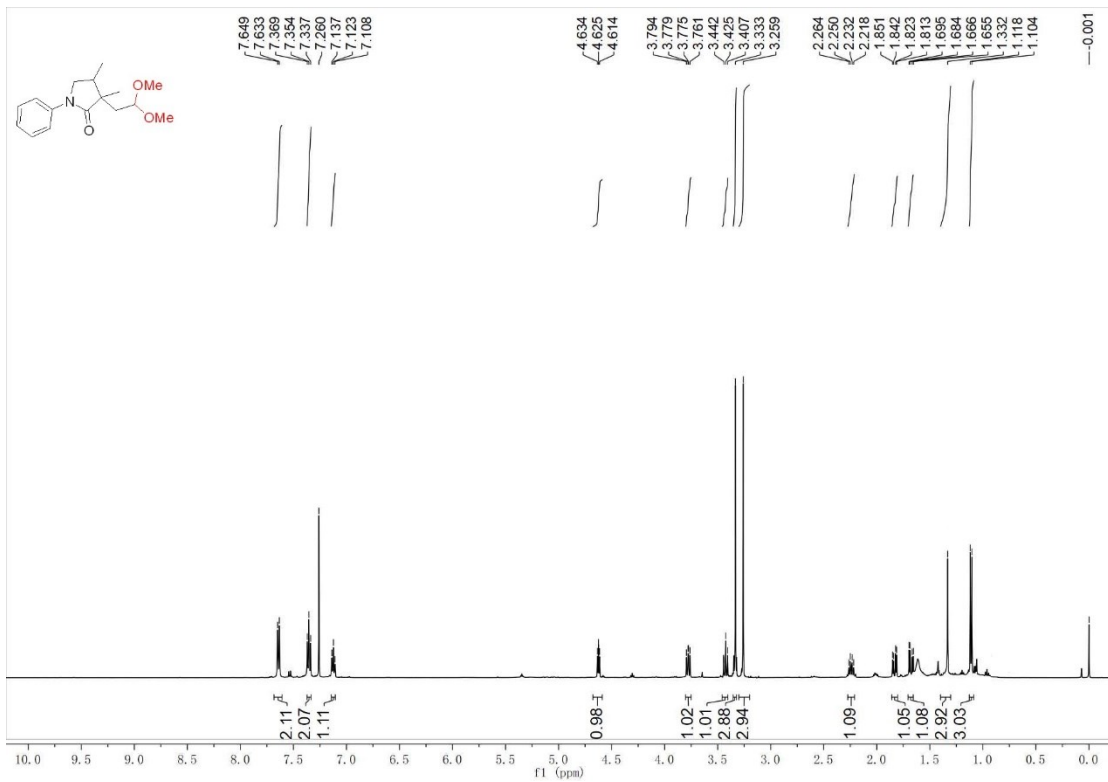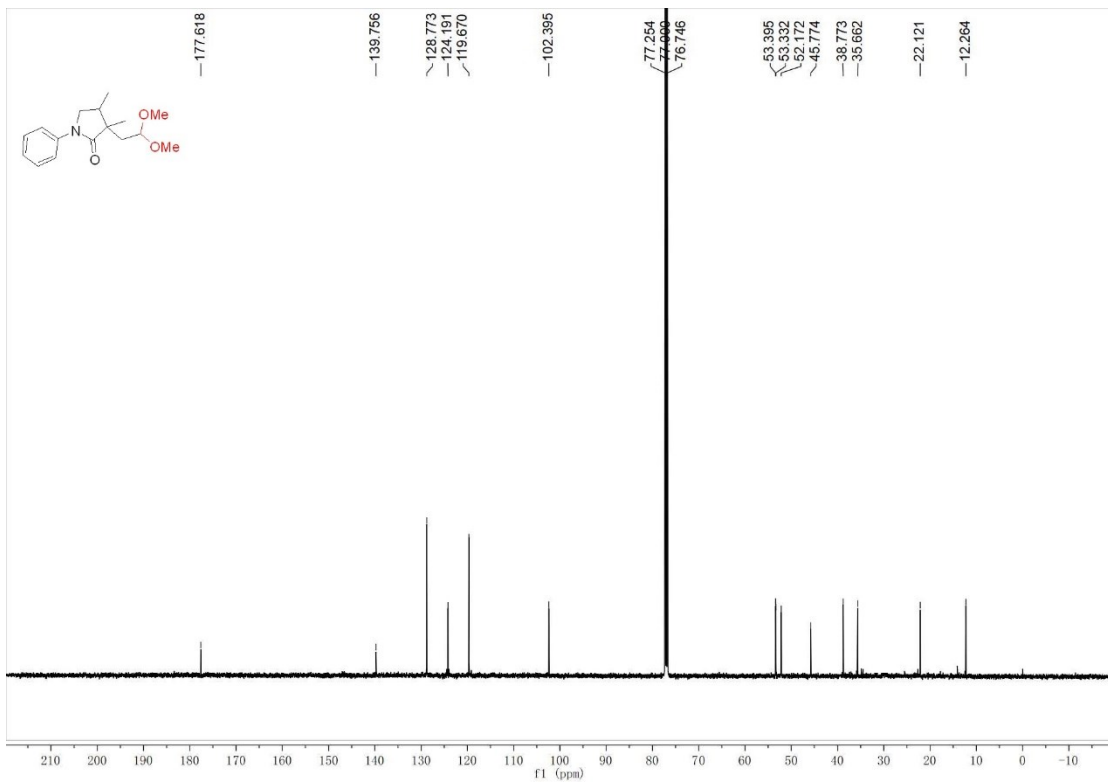

**3-(2,2-Dimethoxyethyl)-3,4-dimethyl-1-(4-(trifluoromethyl)phenyl)pyrrolidin-2-one (7cc)**

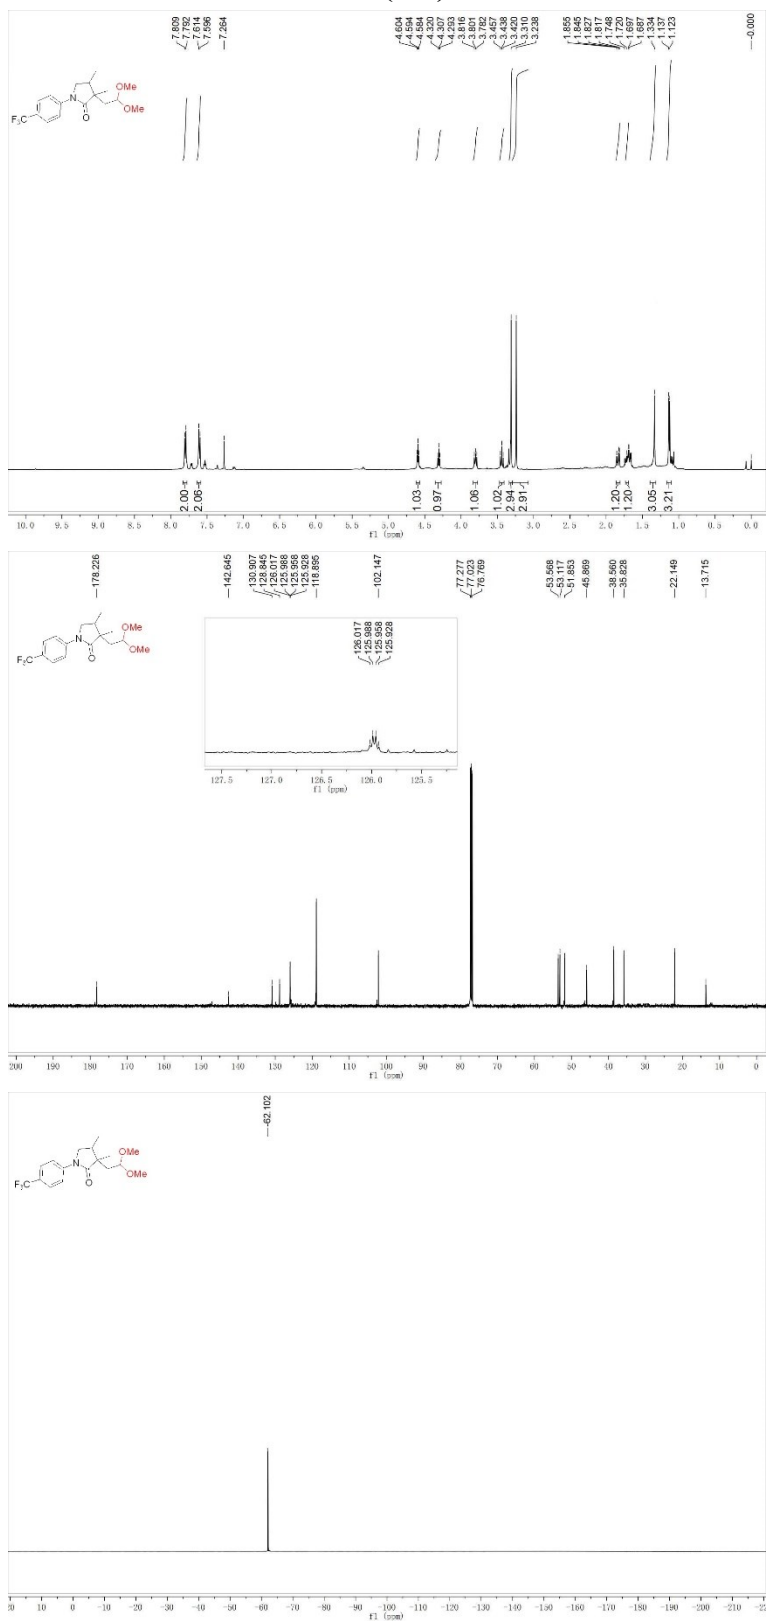

# 1-(4-Bromophenyl)-3-(2,2-dimethoxyethyl)-3,4,4-trimethylpyrrolidin-2-one (7dc)

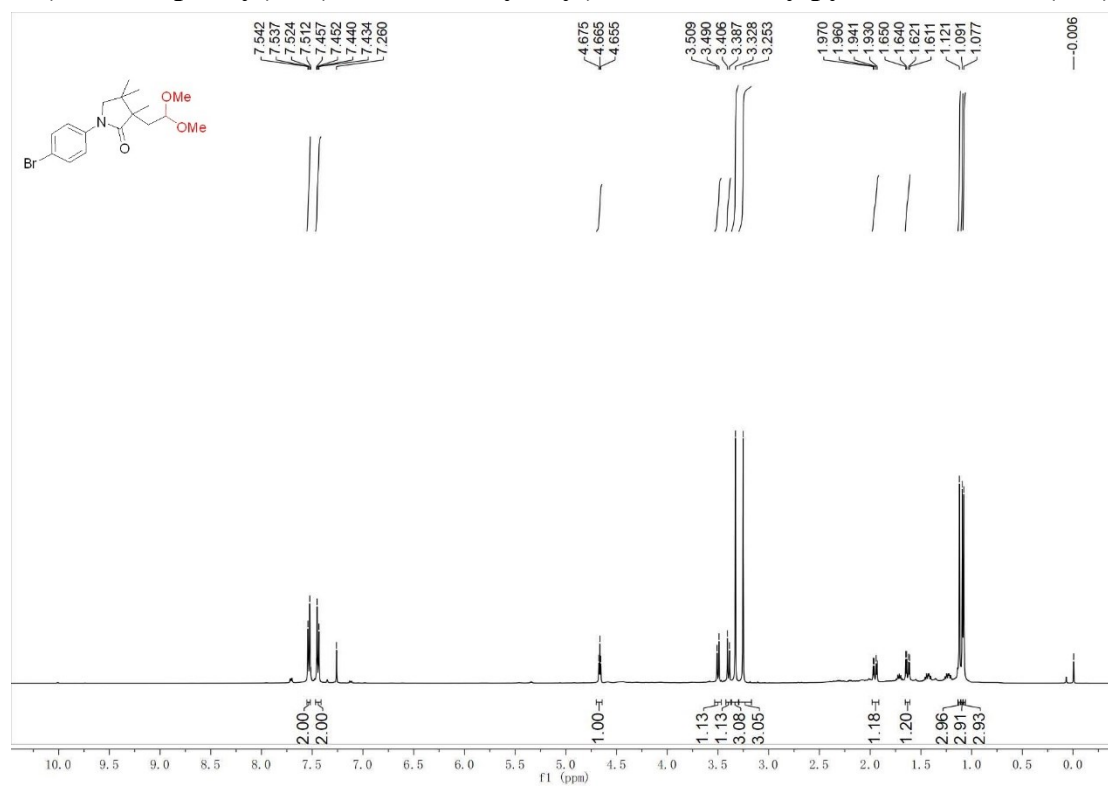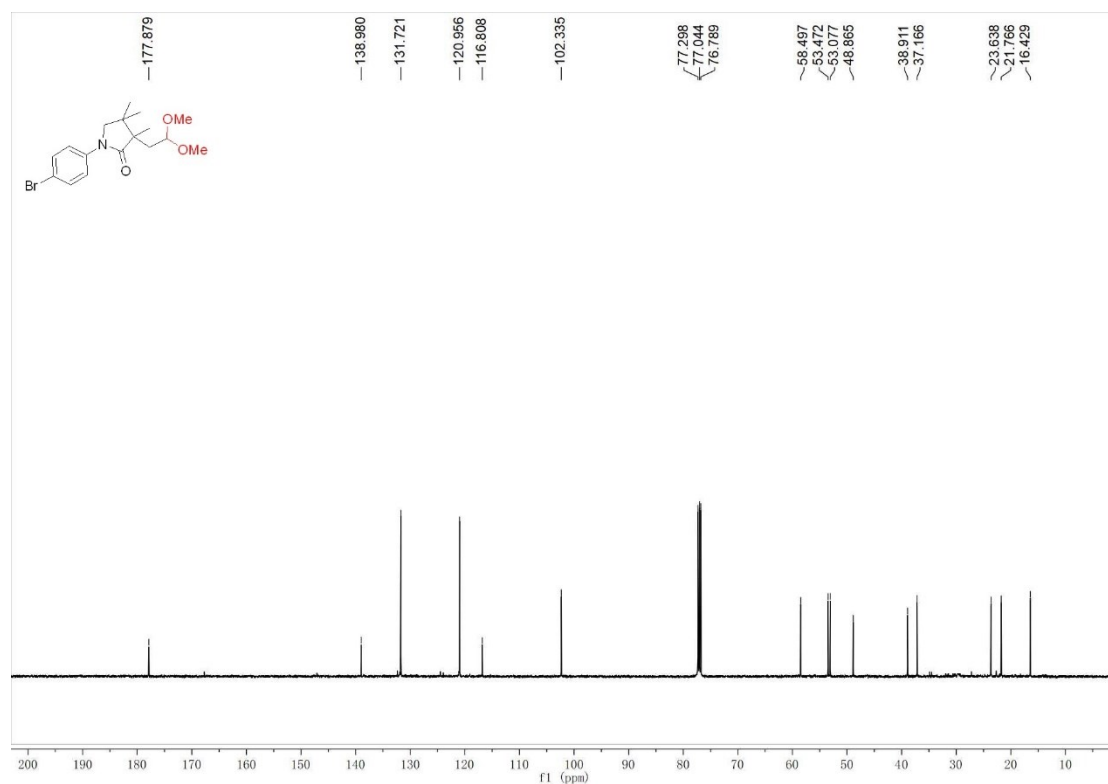

Supplement: d0ob01902j1.pdf [file d0ob01902j1.pdf]
